1           **Proteome-wide probing of the dual NMT-dependent myristoylation**  
2           **tradeoff unveils potent, mechanism-based suicide inhibitors**

3  
4 Frédéric Rivière<sup>iD,1</sup>, Cyril Dian<sup>iD,1</sup>, Rémi F. Dutheil<sup>iD,1</sup>, Carmela Giglione<sup>iD,@,1,\*</sup>, Thierry  
5 Meinel<sup>iD,@,1,\*</sup>

6  
7 <sup>1</sup> Université Paris Saclay, CEA, CNRS, Institute for Integrative Biology of the Cell (I2BC),  
8 91198 Gif-sur-Yvette cedex, France

9  
10 **Running title:** NMT-mediated lysine myristoylation rules and mechanism

11  
12 **\*Correspondence:** [carmela.giglione@i2bc.paris-saclay.fr](mailto:carmela.giglione@i2bc.paris-saclay.fr) (C. Giglione) or  
13 [thierry.meinel@i2bc.paris-saclay.fr](mailto:thierry.meinel@i2bc.paris-saclay.fr) (T. Meinel)

14  
15 <sup>iD</sup> ORCID 0000-0001-6366-1904 (F. Rivière); ORCID iD 0002-6349-3901 (C. Dian); 0002-  
16 2910-6648 (R.F. Dutheil), 0002-7475-1558 (C. Giglione); 0001-5642-8637 (T. Meinel)  
17 <sup>@twitter</sup> @giglionelab (C. Giglione); @meinel (T. Meinel)

18  
19 **Keywords:** Acylation; lysine; myristoylation; *N*-myristoyltransferase; N-terminal  
20 modification

21

## 22 **ABSTRACT**

23 N-myristoyltransferases (NMTs) catalyze protein myristoylation, a major and ubiquitous lipid  
24 modification. Originally thought to modify only N-terminal glycine  $\alpha$ -amino groups (G-  
25 myristoylation), NMTs are now known to modify lysine  $\epsilon$ -amino groups (K-myristoylation),  
26 the significance of which is uncertain. Here we exploited systematic structural proteomics  
27 analyses and a novel pipeline involving the *Shigella* IpaJ protease to discriminate K- and G-  
28 myristoylation with unprecedented accuracy and identify the specific features driving each  
29 modification. NMT-dependent K-myristoylation occurs post-translationally and only on  
30 lysines 1, 2, or 3 following G-myristoylation or caspase cleavage. Direct interactions between  
31 the substrate's reactive amino group and the NMT catalytic base slow K-myristoylation  
32 catalysis. IpaJ unmasked novel K-myristoylation sites in a dozen human proteins. The unique  
33 properties of NMT-driven K-myristoylation allowed us to design potent, mechanism-based  
34 suicide NMT inhibitors. These analyses unravel the respective paths towards K-myristoylation,  
35 G-myristoylation, or NMT inhibition, which rely on a very subtle tradeoff embracing the  
36 chemical landscape around the reactive group.

37

## 38 **SIGNIFICANCE STATEMENT**

39 We report the specific and unique elements guiding N-myristoyltransferase to either alpha or  
40 epsilon myristoylation, allowing us to establish the post-translational nature of N-  
41 myristoyltransferase-dependent lysine myristoylation and design novel, potent N-  
42 myristoyltransferase inhibitors.

43

## 44 INTRODUCTION

45 Myristoylation is an essential lipidation that adds a C:14:0 fatty acid to proteins in all  
46 eukaryotes including pathogens<sup>1-4</sup>. The lipid moiety anchors soluble proteins to membranes,  
47 where they interact with partners to initiate signal transduction<sup>5-7</sup>. N-myristoyltransferases  
48 (NMTs; glycylopeptide N-tetradecanoyltransferases) are the only enzyme class known to  
49 catalyze myristoylation and, given their central role in pathobiology, are promising therapeutic  
50 targets<sup>8-12</sup>. NMTs were long thought to exclusively target proteins with an N-terminal glycine  
51 (G-myristoylation) usually arising from co-translational methionine excision<sup>1,13</sup> or, less  
52 frequently, post-translation cleavage exposing new N-terminal glycines<sup>14,15</sup>. Proteome-wide  
53 approaches have delivered an exhaustive list of substrates undergoing co-translational G-  
54 myristoylation - the so-called G-myristoylome - covering approximately 2% of the human  
55 proteome (~600 proteoforms<sup>16</sup>). Additionally, high-resolution co-crystallography of human  
56 NMT1 with a number of reactive substrates displaying an N-terminal Gly<sup>17</sup> has established a  
57 specific water channel in NMT that provides a water-mediated bond (Wat2) between the N-  
58 terminal group of the G-starting substrate and the C-terminal carboxy group (Q496) of NMT,  
59 which acts as the catalytic base for deprotonation and further reactivity<sup>1,17</sup>. These data have  
60 been instrumental in revealing that NMTs further support myristoylation of lysine side chains  
61 (K-myristoylation), significantly expanding the range of known substrates<sup>17,18</sup>. The  
62 mammalian small G-protein ARF6, which features a K3 following an N-terminal G2, is the  
63 only protein currently known to undergo both N-terminal G- and K-myristoylation<sup>18</sup>, allowing  
64 it to attach to plasma membranes when GTP is bound and permitting K-myristoylation by  
65 sirtuin deacylases upon GTP hydrolysis. In this cycle, NMT ensures the novel ARF6 K-  
66 myristoylation after GTP refueling.

67

68 NMT-dependent G-myristoylation occurs on the  $\alpha$ -amino group of the target protein via an  
69 amide bond, creating an extremely stable attachment *in vivo* and resistance to chemical  
70 cleavage *in vitro*<sup>19-21</sup>. Accordingly, G-myristoylation was considered to be irreversible.  
71 However, the discovery of IpaJ, a pathogenic cysteine-dependent protease produced by several  
72 disease-causing bacteria including *Shigella flexneri*, challenged this four decade-old dogma<sup>22</sup>.  
73 IpaJ cleaves the N-terminal myristoylated G from several proteins. IpaJ relies on the presence  
74 of a G-myristoylated group embedded within a small dipeptide as a minimal chassis<sup>23</sup>, with  
75 strong specificity for C:14 chains over longer (C:16) or shorter (C:10) fatty acyl chains<sup>23</sup>. Since  
76 this study predated the discovery of NMT-driven K-myristoylation, known IpaJ substrates are  
77 limited *in vivo* to the small G-proteins of the ADP-ribosylation factor family (ARF and ARL)  
78 with the exception of ARF6<sup>23,24</sup>. Critically, it is unknown whether IpaJ contributes to the NMT-  
79 dependent K-myristoylome. One major challenge to establishing this lies in the difficulty in  
80 identifying and proving the NMT-dependent K-myristoylome and the type of myristoylation  
81 taking place, the latter usually relying on mass spectrometry (MS). Unequivocal MS/MS (MS2)  
82 spectra of K-myristoylation profiles are not available and, because several acyl hydrolases  
83 targeting K-myristoylation have been described including SIRT2, SIRT6, HDAC8, and  
84 HDAC11, their action might prevent the identification of K-myristoylated substrates *in vivo*.  
85 New approaches for characterizing the K-myristoylome are urgently required.

86  
87 To this end, here we combine mass spectrometry, kinetic studies, *in silico* analysis, and  
88 crystallography of human NMT1 with synthetic peptides to assess the molecular basis of NMT-  
89 dependent K-myristoylation. In doing so, we provide an overview of its coverage in the human  
90 proteome. We reveal that K-myristoylation results from post-translational events as illustrated  
91 by IpaJ-induced cleavage triggering K-myristoylation of a number of targets. Additionally, we  
92 show that G-myristoylation outcompetes K-myristoylation, since G- and K-myristoylation

93 share a similar recognition chassis at the NMT active site. Nevertheless, K-myristoylation  
94 features a number of unique recognition elements, based on which we design novel, selective,  
95 and potent mechanism-based suicide NMT inhibitors.

96

## 97 **RESULTS**

### 98 **Co-translational G-myristoylation predominates over K-myristoylation on N-terminal** 99 **GK-starting peptides**

100 We previously reported unforeseen NMT-binding clefts accommodating peptide substrate  
101 side-chains (pockets 2-8 in **Fig. 1a**) and the N-terminal myristoylome based on the hypothesis  
102 that NMT-dependent myristoylation only occurs on glycines<sup>16</sup>. We and others later reported  
103 NMT-dependent K-myristoylation on position 3 lysines<sup>17,18</sup>. An updated NMT reaction scheme  
104 with the two myristoylation types is displayed in **Supplementary Fig. 1**.

105

106 As a model peptide with a K3 (G<sub>2</sub>KSF<sub>3</sub>SKPR; reference, GK) was an efficient NMT substrate  
107 (**Fig. 1b** and **Supplementary Table 1a**), we assessed which type of myristoylation (G- and/or  
108 K) *Homo sapiens* (Hs)NMT1 catalyzed on this peptide by MALDI-Tof-Tof including MS-MS  
109 (MS2). Together with kinetic analysis, K3 favored G-myristoylation in this model context  
110 (**Supplementary Table 1a, Supplementary Dataset 1** and **Fig. 1b**). We next examined the  
111 myristoylation status of all human proteins starting with N-terminal GKs, including the six  
112 closely related members of the HPCA/NCS1 family and ARF6. In all cases, only G-  
113 myristoylation was unambiguously retrieved (**Fig. 1b, Supplementary Dataset 1** and  
114 **Supplementary Table 1a**), with efficiencies in the same range as reported for the G-  
115 myristoylome, as exemplified by the SOS3 variant (**Fig. 1b**). Remarkably, most N-terminal  
116 GK-starting proteins harbored the S<sub>6</sub>K<sub>7</sub> motif, which is known to facilitate myristoylation<sup>25</sup>.

117 Indeed, the salt bridges of K7 with the three contiguous Ds of the NMT Ab-loop were recently  
118 shown to promote the movement of the Ab-loop from an open to a closed conformation  
119 (SuppFig.7 in <sup>17</sup>), favoring catalysis through distortion of the MyrCoA thioester bond in the  
120 closed conformation and facilitating transition to the tetrahedral state.

121  
122 A new crystal structure of HsNMT1 with a peptide corresponding to the N-terminus of HPCA  
123 revealed that the K3 side chain buries tightly in pocket 3 of NMT and that its positive charge  
124 bonds the catalytic base (**Fig. 1c**). Full occupation of pocket 3 with K3 slightly displaces the  
125 reactive alpha amino group of G2 from the MyrCoA thioester group whilst retaining the Wat2  
126 interaction of the reactive N-terminal  $\alpha$ -amino group required for G-myristoylation<sup>17</sup> (**Fig.**  
127 **1c,d**). This K3-induced displacement of G2 confirms that, at position 3, a K residue is less  
128 favorable to myristoylation than any amino acid with a smaller, uncharged side chain.

129  
130 To examine whether GK-starting proteins have the same recognition rules as those in the G[<sup>^</sup>K]  
131 context (where <sup>^</sup>X means any amino acid other than X)<sup>16</sup>, we analyzed HsNMT1's capacity to  
132 acylate a series of changes in the N-terminal peptide derived from NCS1. Only G-  
133 myristoylation occurred when K7 was changed into G or S6 into A, although HsNMT1's  
134 catalytic efficiency significantly decreased (**Supplementary Table 1b** and **Supplementary**  
135 **Dataset 1**). Therefore, the S6K7 motif is equally important for GK- and G[<sup>^</sup>K]-starting  
136 proteins, i.e., the role of S6 in substrate binding and K7 in the MyrCoA binding-induced  
137 conformational switch of the conserved flexible acidic Ab-loop of NMT is equal to that already  
138 reported and starting with G[<sup>^</sup>K]<sup>17</sup>. We next assessed whether modifying the side-chain length  
139 but retaining the basic character at position 7 impacted the myristoylation type. Shortening the  
140 basic side chain to ornithine (Orn, reduced by one CH<sub>2</sub>) or di-amino butyrate (Dab, reduced by  
141 two CH<sub>2</sub>s) had little impact on G-myristoylation (**Supplementary Table 1b**), suggesting

142 maintenance of the salt bridge with the Ab-loop. Further shortening to di-amino propionate  
143 (Dap, short basic chain CH<sub>2</sub>NH<sub>2</sub>) or removal of the basic character with homocysteine (Hcy)  
144 significantly reduced catalytic efficiency but still promoted only G-myristoylation  
145 (**Supplementary Table 1b** and **Supplementary Dataset 1**).

146

147 To further investigate the rules governing myristoylation by NMT, we substituted the G2 with  
148 an A in the GK-context variant devoid of K3 (A<sub>2</sub>NCFSKPR; AN). There was unambiguous  $\alpha$ -  
149 myristoylation by both MS and crystallographic analyses (**Extended Data 1a, Supplementary**  
150 **Dataset 1** and **Supplementary Table 1a**). Catalytic data indicated that the substrate was very  
151 inefficiently modified by NMT (**Fig. 1b**), and the crystal structure of AN confirmed that the  
152 active site was filled with a methyl addition, improperly orientating the reactive amino group.  
153 To decipher whether an A resulted in significant myristoylation in another sequence context,  
154 we substituted G2 with A in G<sub>2</sub>SSVSKKK, which was not myristoylated (**Supplementary**  
155 **Dataset 1**), clearly indicating that the S<sub>6</sub>K<sub>7</sub> motif is insufficient for reactivity in the A<sub>2</sub> context.  
156 The same was also true for an AGK variant (**Fig. 1b, Supplementary Table 1a**). In all cases,  
157 the G2A substitution dramatically reduced myristoylation but eventually led to G-  
158 myristoylation.

159

160 We therefore wondered whether the strong hindrance to the active site promoted by the  
161 additional methyl chain of A was similar if this group was grafted directly on the N-terminus.  
162 The N-methyl-GN peptide (meGN, meG is an isomer of A) led to very poor efficiency G-  
163 myristoylation (**Fig. 1b, Supplementary Table 1a**). Furthermore, the crystal structure of  
164 HsNMT1 in complex with meGN revealed that the methyl rotated the side-chain of N3 around  
165 C $\alpha$ 3, which was orientated towards the catalytic base, whereas the methylated N-terminus was

166 positioned in pocket 3 (**Extended Data 1b,c**), explaining the low performance of this substrate  
 167 for G-myristoylation. Therefore, any subtle modification around G2 protrudes aa2 into pocket  
 168 3, resulting in aa3 oriented in pocket 2 at the catalytic center<sup>17</sup>.  
 169

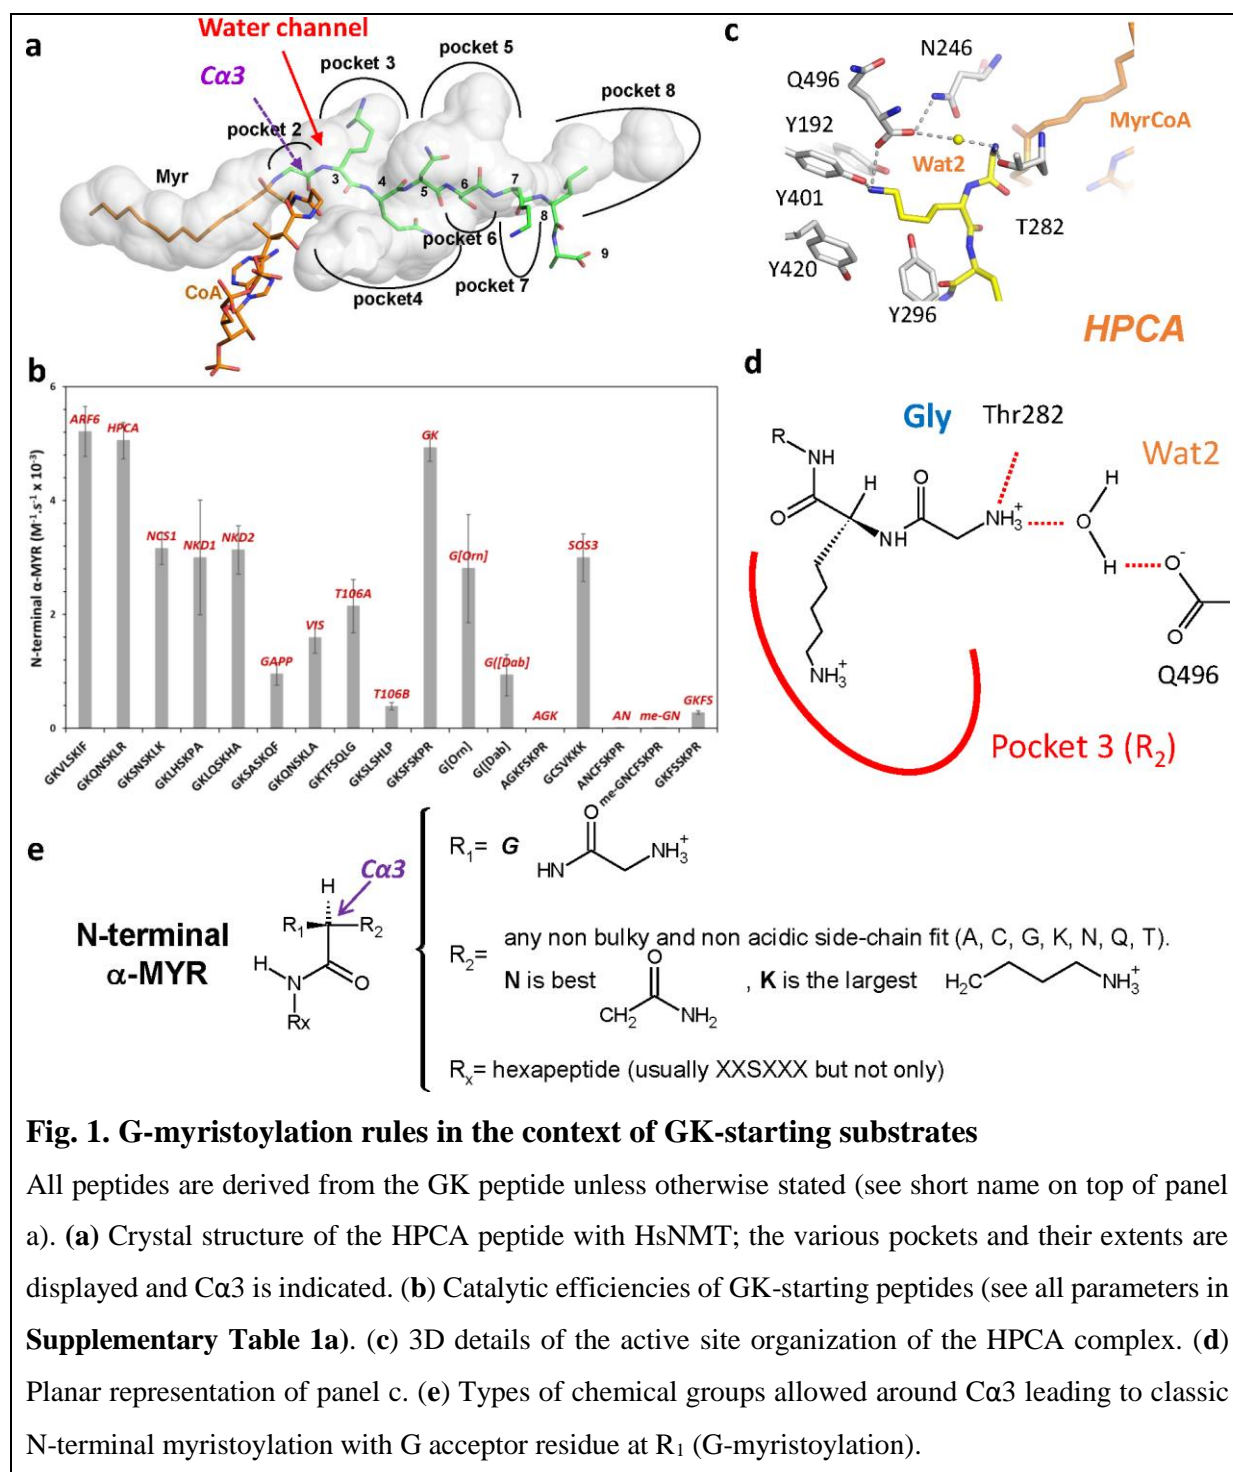

170  
 171  
 172  
 173  
 174  
 175  
 176  
 177  
 178



179 Together, these data indicate that GK-starting peptides lead to G-myristoylation, which relies  
180 on G2 and the S6K7 motif. In the less favorable K3 context, S<sub>6</sub>K<sub>7</sub> becomes even more crucial  
181 for G-myristoylation, consistent with previous reports suggesting strong dependence of G-  
182 myristoylation on K3 and K7<sup>18,26</sup>. However, considering that the N-termini of T106A/B  
183 (GKSLSHLP, GKTFSQLG) are unambiguously NMT substrates (**Fig. 1b** and **Supplementary**  
184 **Table 1a**) despite the absence of K7, the deduced motif for G-myristoylation with K3 is  
185 GKXXSX (**Fig. 1e**). We noticed that both T106A/B harbor a highly hydrophobic residue at  
186 position 5 (L and F, respectively), another feature favoring G-myristoylation<sup>16,25</sup>, which  
187 probably compensates for the absence of K7 and leads to efficient G-myristoylation. In  
188 addition, both ARF6 and GK possess a hydrophobic residue at position 5 (**Fig. 1b**) so,  
189 consistent with its positive role, permutation of positions 4 and 5 in the GK background  
190 (GKFS) significantly reduced myristoylation efficiency (**Fig. 1b**).

191

### 192 **K3 myristoylation of N-acetylated peptides with the S6K motif**

193 In apparent contradiction to the above results, the GK-starting protein ARF6 was recently  
194 shown to accept K-myristoylation *in vivo*<sup>18</sup>, but only if the G2  $\alpha$ -amino group was unreactive  
195 due to previous N-acetylation (*ac*) or G-myristoylation. We therefore examined any  
196 modification around the reactive G2 amino group allowing K-myristoylation of either the  
197 HPCA, ARF6, and/or GK-starting peptides. As expected, *ac* of the three G-starting peptides  
198 led to side-chain myristoylation, provided that K occupied position 3 (**Fig. 2a, Supplementary**  
199 **Table 1c** and **Supplementary Dataset 1**). When the K side chain was shortened to Orn, in the  
200 context of N-acetylated peptides, side chain myristoylation was still observed at position 3  
201 (**Fig. 2a**). The catalytic efficiencies of the *ac* series were one order of magnitude lower than  
202 those of G-myristoylation (**Supplementary Table 1a,c**), with the catalytic constant ( $k_{cat}$ )

203 accounting for most of the  $k_{cat}/K_m$  decrease in both cases. This suggested that the affinity  
 204 provided by the peptide core was similar but that catalysis had a limiting step.  
 205

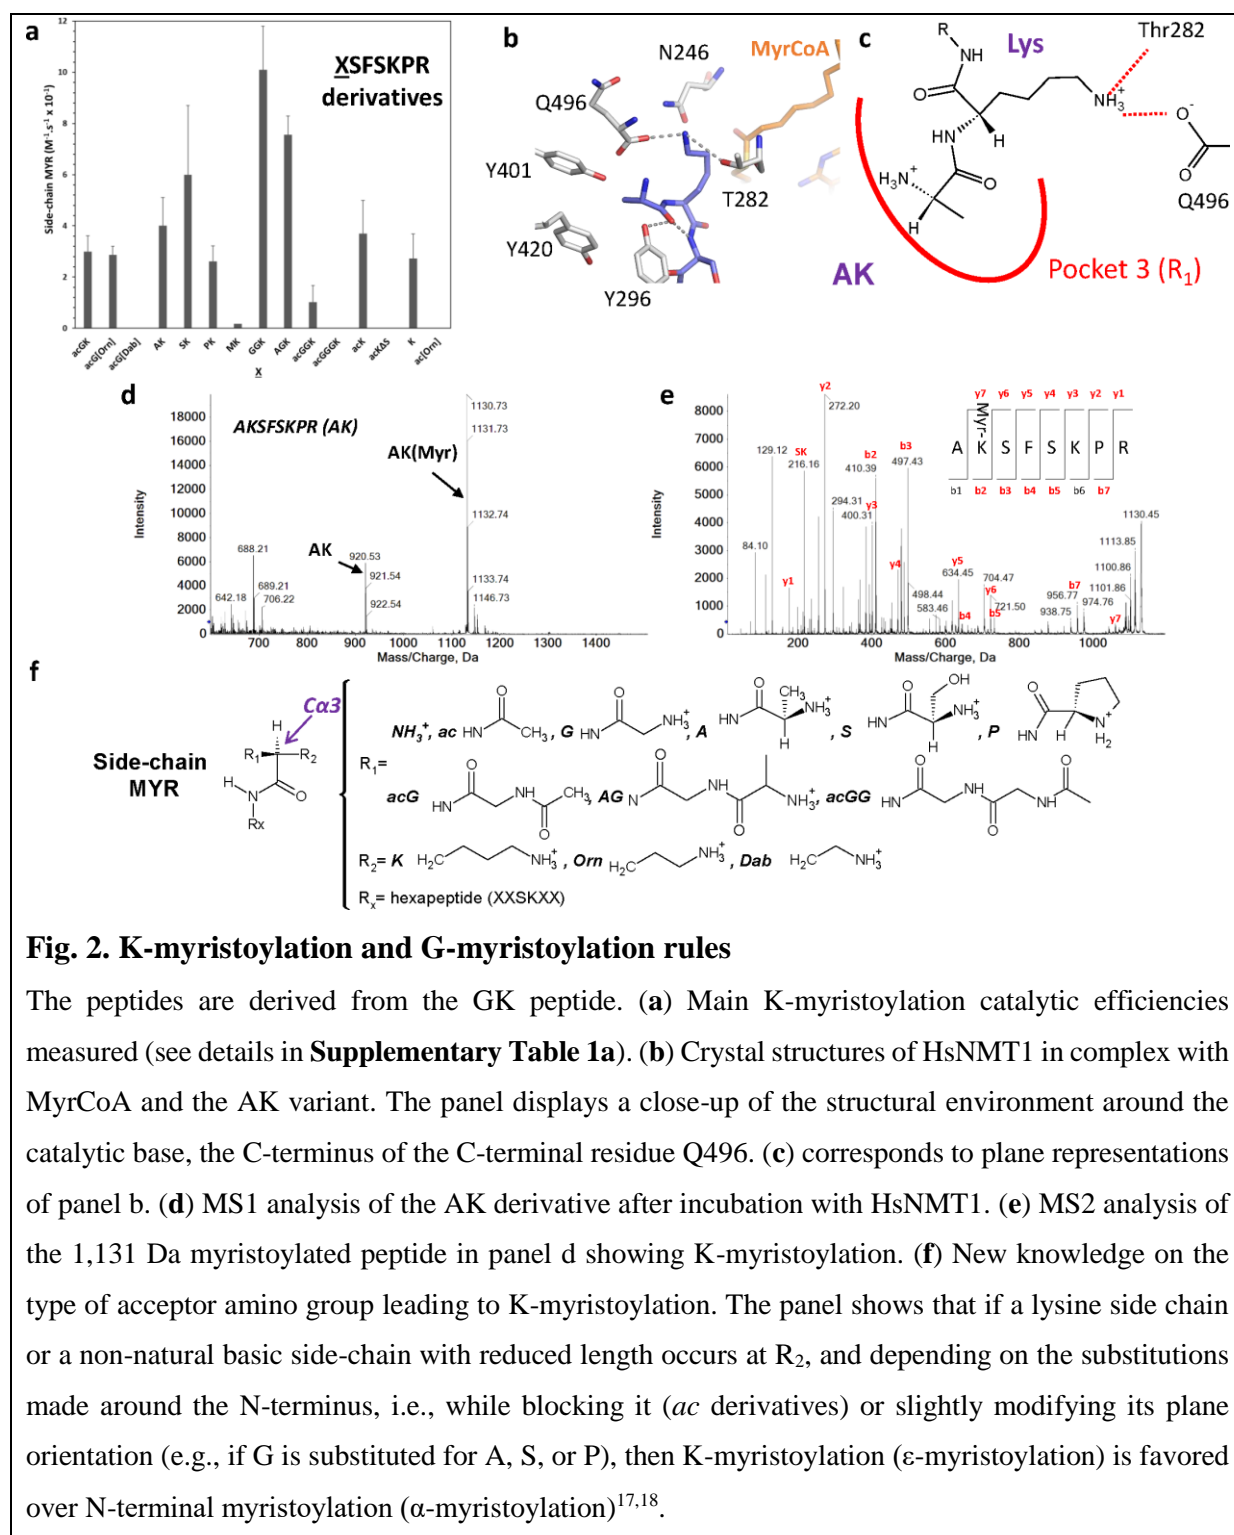

206 **Fig. 2. K-myristoylation and G-myristoylation rules**  
 207  
 208 The peptides are derived from the GK peptide. (a) Main K-myristoylation catalytic efficiencies  
 209 measured (see details in **Supplementary Table 1a**). (b) Crystal structures of HsNMT1 in complex with  
 210 MyrCoA and the AK variant. The panel displays a close-up of the structural environment around the  
 211 catalytic base, the C-terminus of the C-terminal residue Q496. (c) corresponds to plane representations  
 212 of panel b. (d) MS1 analysis of the AK derivative after incubation with HsNMT1. (e) MS2 analysis of  
 213 the 1,131 Da myristoylated peptide in panel d showing K-myristoylation. (f) New knowledge on the  
 214 type of acceptor amino group leading to K-myristoylation. The panel shows that if a lysine side chain  
 215 or a non-natural basic side-chain with reduced length occurs at  $R_2$ , and depending on the substitutions  
 216 made around the N-terminus, i.e., while blocking it (*ac* derivatives) or slightly modifying its plane  
 217 orientation (e.g., if G is substituted for A, S, or P), then K-myristoylation ( $\epsilon$ -myristoylation) is favored  
 218 over N-terminal myristoylation ( $\alpha$ -myristoylation)<sup>17,18</sup>.

219 The crystal structures of HsNMT1 in complex with acG[Orn] or an acGN non-reactive  
220 derivative were obtained and compared with the acGK and acGN variants. In both cases, there  
221 was rotation around the C $\alpha$  of the aa3 side chain (C $\alpha$ 3), as expected from the *ac* addition. The  
222 acG group moved to pocket 3, and the aa3 side chain contacted the catalytic base (**Extended**  
223 **Data 2a-d**). The K side chain of acGK bonded directly with the C-terminal catalytic base of  
224 NMT, unlike the G-myristoylation mechanism, which involves a water-mediated bond (**Fig.**  
225 **1c,d**). acG[Orn] led to a weaker salt bridge with the catalytic base than acGK, as the distance  
226 was increased from 3.1 to 3.6 Å (**Extended Data 2e**). Nevertheless, the associated K-  
227 myristoylation mechanism still involved direct interaction between the catalytic base and the  
228 ammonium group of Orn, like with acGK (**Extended Data 2c-f**). Further reduction to Dab  
229 dramatically decreased K-myristoylation (**Fig. 2a, Supplementary Dataset 1 and**  
230 **Supplementary Table 1c**). Therefore, tight direct binding of the K side chain reactive amino  
231 group to the catalytic base most likely explains effective but slower K-myristoylation compared  
232 to G-myristoylation.

233

### 234 **Side chain myristoylation at K3 is preferred over N-terminal $\alpha$ -myristoylation when the** 235 **N-terminal residue is not G**

236 Therefore, C $\alpha$ 3 tends to rotate and embed the N-terminal group into pocket 3 provided any  
237 change in G2 (**Fig. 1e**) and, if aa3 displays an amino group (e.g., K3), it becomes reactive and  
238 promotes K-myristoylation. This suggests that the strong negative effect of the G2A  
239 substitution might favor K-myristoylation in the presence of K3. To test this hypothesis, we  
240 examined G2A HPCA (A-HPCA), ARF6 (A-ARF6), and GK variants (AK), all featuring a K3.  
241 In all cases, crystallographic and/or MS analysis unambiguously showed K-myristoylation  
242 (**Fig. 2b-e, Extended Data 3 and Supplementary Table 1c**). The catalytic efficiencies with

243 AK and A-ARF6 were (i) significantly greater than with A-HPCA and (ii) of the same order  
244 of magnitude as the acetylated versions of the corresponding variants. Therefore, the K side  
245 chain was preferred over the  $\alpha$ -amino provided that a side chain (e.g., methyl of A) was grafted  
246 onto the reactive residue instead of G2. The crystal structure of AK complexed with HsNMT1  
247 (**Fig. 2b,c**) showed that the K3 side chain bonded to the C-terminal catalytic base (Q496) and  
248 to T282 and the A2 side chain buried in pocket 3. Again, direct bonding to the catalytic base  
249 likely explains the reduced catalysis compared to the G-myristoylation water-mediated  
250 bonding of the GK or HPCA peptide. The lower  $K_m$  of the acG derivatives may be related to  
251 additional interactions of the entire A2 chain in pocket 3 (**Fig. 2b**).

252

253 We next interrogated the human proteome to discover possible K-myristoylation targets  
254 featuring AKXXSK immediately following an M start residue (M1). Only tuberin (TCS2;  
255 P49815; **Supplementary Table 2a**) was identified, but no myristoylation was observed with  
256 the corresponding peptide derivative (AKPTSKDS; **Supplementary Table 1c**), perhaps due  
257 to the P4 inducing a local conformational kink disfavoring both G- and K-myristoylation by  
258 misaligning S6K7 with the reactive amino upstream group. The absence of a hydrophobic side  
259 chain at residue 5 (similar to A-HPCA vs A-ARF6 or AK) might also explain this phenomenon,  
260 as noted above for G-myristoylation.

261

262 We next examined whether non-G N-termini other than A might also lead to K-myristoylation  
263 by replacing the N-terminal G2 of the GK peptide with M, S, and P. K-myristoylation occurred  
264 in all cases with catalytic efficiencies inversely proportional to side chain length (**Fig. 2a**,  
265 **Supplementary Table 1c** and **Supplementary Dataset 1**). We concluded that the nature of  
266 the N-terminal residue was a major determinant guiding N-terminal K-myristoylation,  
267 provided that aa3 harbored a proximal acceptor group (**Fig. 2f**). Due to improper positioning

268 of the N-terminal amino group, any non-G-starting peptides with the S6K7 motif may be  
269 modified by NMT but with extremely poor catalytic efficiencies several orders of magnitude  
270 lower than the corresponding G derivative. A K3 downstream of any amino acid at position 2  
271 but G permits K-myristoylation with dramatically increases associated catalytic efficiencies  
272 (**Supplementary Table 1a**). Higher efficiencies are possible when the peptide context is  
273 favorable, as with AK and A-ARF6 peptides (this work and <sup>18</sup>). Remarkably, both peptides  
274 feature a bulky, hydrophobic, favorable residue at position 5 (F or L, respectively), already  
275 shown to be important for G-myristoylation (see <sup>16</sup>). Finally, interrogation of data libraries  
276 indicated that no protein with A2 (i.e., originating from M1 excision) undergoes K-  
277 myristoylation in the human proteome.

278

279 Taken together, our data reveal that K-myristoylation does not require a given side chain of the  
280 first amino acid but relies on optimal residues at position 5-7. The [^G]KX[FL]SK motif  
281 emerges as the determinant of K-myristoylation (where ^X means any residue but X). Any  
282 non-G2 side chains appear to privilege pocket 3 binding, preventing their reactivity and  
283 ensuring high specificity for G2 undergoing G-myristoylation.

284

285 In the human proteome, 7548 hits harbored a KXXSK motif (**Supplementary Table 2a**)  
286 corresponding to 2831 unique entries with 3615 sites in 6764 proteoforms (14-15% of the  
287 proteome). 572 sequences displayed F or L at position 3, like in ARF6 or the GK peptide.  
288 Among the 29 sequences with translation start sites at positions 1 or 2 (i.e. arising from  
289 cotranslational N-Met removal rules), 10 of the 15 known G-myristoylated N-termini starting  
290 with GK were found <sup>16</sup> plus a few additional sequences, most not comprising F or L3, like  
291 TSC2. The other 3595 sequences corresponded to internal sequences starting beyond codon 3,  
292 and 285 were preceded by a G suggesting large scope for post-translational G-myristoylation

293 in this subset. Post-translational myristoylation, however, requires prior unmasking by  
294 proteolytic cleavage provided before the first XK. Indeed, a number of K-myristoylation sites  
295 among the 543 [^G]KX[FL]SK internal sequences were preceded by a classic caspase motif  
296 (**Supplementary Table 2b-e**). Therefore, unlike G-myristoylation, K-myristoylation should  
297 solely arise from post-translational myristoylation.

298

#### 299 **Myristoylation may occur on Lys4**

300 We next wondered whether extending the amino acid sequence upstream of the reactive K  
301 might lead to K-myristoylation, provided that a two-amino acid spacer between the accepting  
302 K and the S6K7 motif was retained. We therefore grafted an extra N-terminal A or G to the  
303 GK peptide (A- or G-GKSFSKP; AGK or GGK) and checked whether HsNMT1 could acylate  
304 the K at position 4. By MS and kinetic analysis, K-myristoylation was as efficient with these  
305 A/G-grafted peptides as with the acG peptides (**Fig. 2a; Supplementary Table 1c** and  
306 **Extended Data 3**). We concluded that the pocket usually hosting residue 3 could host a  
307 dipeptide moiety as large as AG provided that a close and available K-reactive side chain was  
308 properly spaced from the crucial S6K7 motif. We noted that, with five bonds and a positive  
309 charge, a K side chain was the most bulky moiety tolerated in NMT pocket 3 for G-  
310 myristoylation. With seven bonds, the AG backbone is much bulkier than K but still promoted  
311 K-myristoylation (**Fig. 2f**). To establish whether larger chains would make K-myristoylation  
312 possible, we examined large, poorly-branched N-terminal grafts larger than GG or AG  
313 (AcGGK, AcGGGK, AcGGGGK, and AcGGGGGK with 9, 12, 15, and 18 bonds,  
314 respectively) upstream of K3 in the GK series. With AcGGK and AcGGGK, there was  
315 unequivocal K-myristoylation by MALDI analysis (**Supplementary Dataset 1**). K-  
316 myristoylation catalytic efficiency progressively decreased with increasing chain length to very

317 low values, and K-myristoylation was not detected for AcGGGGK or AcGGGGGK  
318 (**Supplementary Table 1c**). The crystal structure obtained with the GGK derivative showed  
319 that the GG chain is fully buried in pocket 3 and propels the main backbone peptide chain into  
320 a more remote location at C $\alpha$ 3 (**Supplementary Fig. 2a,b**); there is also a greater distance  
321 between the reactive K amino group and both the catalytic base and T282. The 7-bond GG or  
322 AG chain corresponds to the bulkiest chains accepted by pocket 3 for efficient K-  
323 myristoylation (**Fig. 2f**). When longer than 4 residues, as in the case of K, the backbone chain  
324 tends to not be perfectly aligned, but this is not responsible for the lower catalytic rates  
325 observed.

326

327 We concluded that to allow K-myristoylation, the [<sup>^</sup>G]KX[FL]SK motif may be associated  
328 with a one amino acid extension or *ac* at the N-terminus, provided that an *ad hoc* proteolytic  
329 cellular machinery can produce such extremities. In addition, about two dozen internal  
330 XXXXXSK K-myristoylation motifs were noted in the human proteome displaying an  
331 upstream classic caspase cleavage site (**Supplementary Table 2a,b,c**).

332

333 With the knowledge that K4 may be reactive in the context of a G<sub>2</sub>XK<sub>4</sub> derivative, we next  
334 assessed whether G<sub>2</sub>- and K<sub>4</sub>-myristoylation could compete within the same protein. For this,  
335 we first altered the G-myristoylation S<sub>6</sub>K<sub>7</sub> motif of the GK peptide by introducing an additional  
336 S between S<sub>6</sub> and K<sub>7</sub>, pushing the K back to position 8 (G<sub>2</sub>G<sub>3</sub>K<sub>4</sub>F<sub>5</sub>S<sub>6</sub>S<sub>7</sub>K<sub>8</sub>PR). The resulting  
337 peptide therefore featured two overlapping myristoylation motifs separated by a two amino  
338 acid spacer, one for modification of the  $\alpha$ -group of G<sub>2</sub>, relying on motif S<sub>6</sub>S<sub>7</sub>, and a second on  
339 the  $\epsilon$ -amino of K<sub>4</sub>, relying on motif S<sub>7</sub>K<sub>8</sub>. This modification reduced the catalytic efficiency  
340 compared to the GK peptide (**Supplementary Table 1a**). Furthermore, the MS<sup>2</sup> spectra of the



341 1,173 Da myristoylated product favored G-myristoylation over K-myristoylation (**Extended**  
342 **Data 4a**), with evidence of the major G-myristoylation product as unambiguous characteristic  
343 b<sub>2</sub>, y<sub>7</sub>, and y<sub>8</sub> ions (**Extended Data 4b**). Nevertheless, we could not exclude the possibility of  
344 K-myristoylation, as the associated prototypic K-myristoylation ions could only be identified  
345 at low intensity. Therefore, other experimental approaches were required to assess for  
346 simultaneous K-myristoylation.

347

### 348 **The IpaJ protease as a tool to unravel ε-myristoylation**

349 Whatever the context, G-myristoylation is favored over K-myristoylation when in competition.  
350 Since only an N-terminal G appears to promote myristoylation, K-myristoylation is unlikely to  
351 originate from a co-translational event. However, because K-myristoylation might be further  
352 added through post-translational insertion, identifying the conditions favoring this event would  
353 be useful. To date, two physiological proteolytic states have been shown to impact  
354 myristoylation: caspase and IpaJ proteolytic cleavage, and indeed several internal K-  
355 myristoylation sites may arise from caspase cleavage.

356

357 The virulence factor IpaJ from *Shigella flexneri* is a cysteine protease that specifically  
358 recognizes the myristoyl (Myr)-G moiety of several human proteins *in vivo*<sup>24</sup>. As a result of its  
359 activity on Myr-G-peptides (**Supplementary Fig. 3a**), IpaJ is predicted to induce a 267 Da  
360 shift (Myr-Gly product) in MALDI MS spectra. Since it cleaves off G-myristoylation sites, we  
361 anticipated that IpaJ - provided it specifically processes any G-myristoylated peptide – could  
362 be used to unravel unambiguous and undiscovered K-myristoylation modification sites.



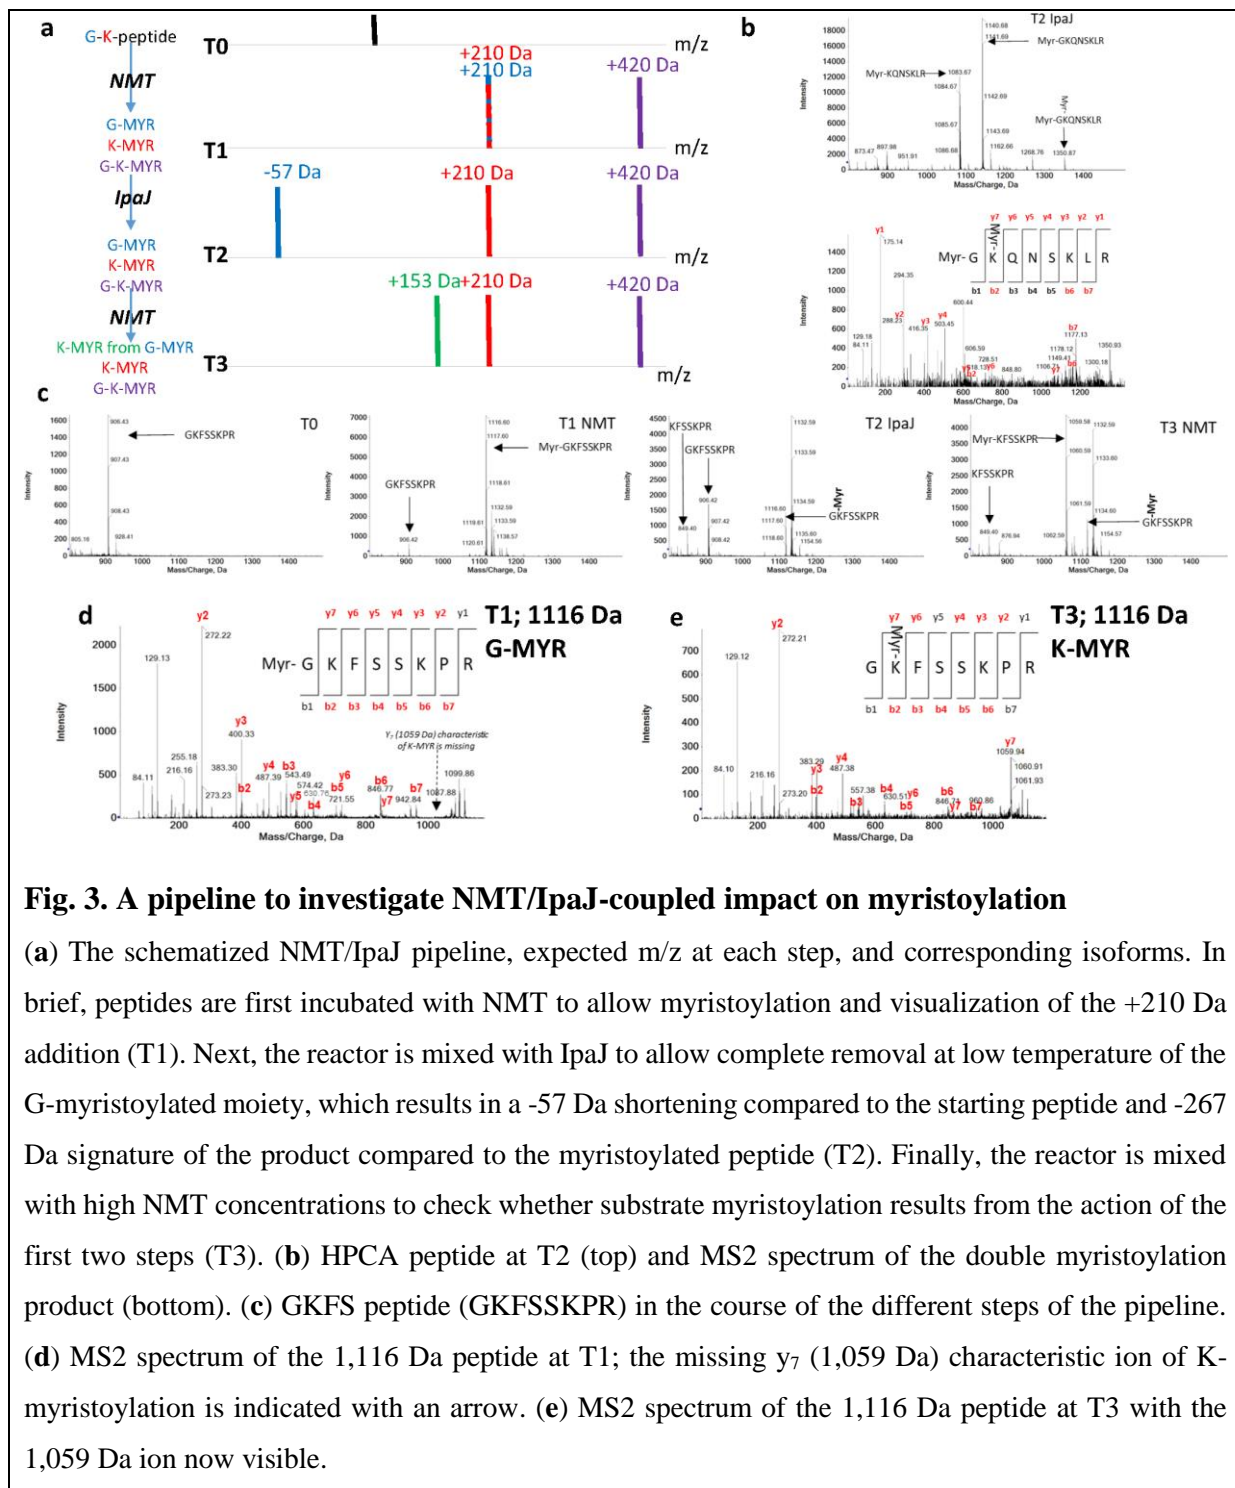

363

364 **Fig. 3. A pipeline to investigate NMT/IpaJ-coupled impact on myristoylation**

365 (a) The schematized NMT/IpaJ pipeline, expected m/z at each step, and corresponding isoforms. In  
 366 brief, peptides are first incubated with NMT to allow myristoylation and visualization of the +210 Da  
 367 addition (T1). Next, the reactor is mixed with IpaJ to allow complete removal at low temperature of the  
 368 G-myristoylated moiety, which results in a -57 Da shortening compared to the starting peptide and -267  
 369 Da signature of the product compared to the myristoylated peptide (T2). Finally, the reactor is mixed  
 370 with high NMT concentrations to check whether substrate myristoylation results from the action of the  
 371 first two steps (T3). (b) HPCA peptide at T2 (top) and MS2 spectrum of the double myristoylation  
 372 product (bottom). (c) GKFS peptide (GKFSSKPR) in the course of the different steps of the pipeline.  
 373 (d) MS2 spectrum of the 1,116 Da peptide at T1; the missing y<sub>7</sub> (1,059 Da) characteristic ion of K-  
 374 myristoylation is indicated with an arrow. (e) MS2 spectrum of the 1,116 Da peptide at T3 with the  
 375 1,059 Da ion now visible.

376

377 The *S. flexneri* *IpaJ* gene was cloned and the protein overexpressed and purified to  
 378 homogeneity (Supplementary Fig. 3b,c). An inactive variant (IpaJ-C64S) was also produced  
 379 as a control. Under specific conditions (Supplementary Fig. 3d), IpaJ was sufficient to cleave

380 off the G-myristoylated moiety from any tested peptide *in vitro*, unlike IpaJ-C64S  
381 (**Supplementary Fig. 4a,b,c**). Additionally, IpaJ was inactive on an N-acetylated G-peptide,  
382 an A2-myristoylated peptide, and a K3-myristoylated peptide derived from ARF6  
383 (**Supplementary Fig. 4d** and **Supplementary Table 1d,e**). Due to its unique and high  
384 specificity for G-myristoylation and the observed complete cleavage of any G-myristoylated  
385 peptide, we concluded that IpaJ could be used as powerful tool to distinguish G-myristoylation  
386 from K-myristoylation and, additionally, investigate IpaJ-dependent post-translational K-  
387 myristoylation.

388

389 We therefore established an IpaJ pipeline that determined the myristoylation type of any  
390 peptide subjected to NMT (**Fig. 3a**). The workflow faithfully reproduced the sequence of  
391 events occurring in the context of cellular IpaJ activity. As proof-of-concept, a dozen peptides  
392 were carefully chosen for their sequence diversity and ability to undergo G-myristoylation  
393 (**Supplementary Fig. 5a,b**; see ARF6 in **Supplementary Fig. 6**). Combined with previous  
394 data<sup>23</sup>, IpaJ efficiently cleaved any G-myristoylated peptide regardless of the sequence  
395 downstream of the G residue (**Supplementary Fig. 5c**).

396

397 Taking the double myristoylation of ARF6 at both the N-terminus of G2 and the side chain of  
398 K3 into account<sup>18</sup>, we used the IpaJ pipeline to identify double myristoylation of other GK-  
399 starting NMT substrates. We identified dual myristoylation of a peptide derived from  
400 HPCA/HPCL1/NCALD in the presence of IpaJ (**Fig. 3b**; **Supplementary Fig. 7**). Finally,  
401 double myristoylation was not observed with other closely related substrates of HPCA in the  
402 same NCS1 family of calcium sensors sharing the GK motif (**Supplementary Dataset 1**). We  
403 cannot exclude that the extremely high hydrophobicity of such acylated products prevented  
404 their crystallization in the matrix and consequently their identification.

## 405 Competition between G- and K-myristoylation

406 With the IpaJ/NMT pipeline in hand, we next examined the ambiguous myristoylation state of  
407 the GGKFSSKPR peptide. At T1, MS2 analysis unambiguously revealed G-myristoylation as  
408 a product (**Extended Data 4b**). At T2 (i.e., after incubation with NMT and IpaJ), both an  
409 uncleaved myristoylated peptide and a shorter, 267 Da peptide resulting from G-myristoylation  
410 cleavage were identified (T2, **Extended Data 4c**). There was also unambiguous and unique K-  
411 myristoylation at K4 of the GGKFSSKPR peptide at T3 (**Extended Data 4c,d**).

412

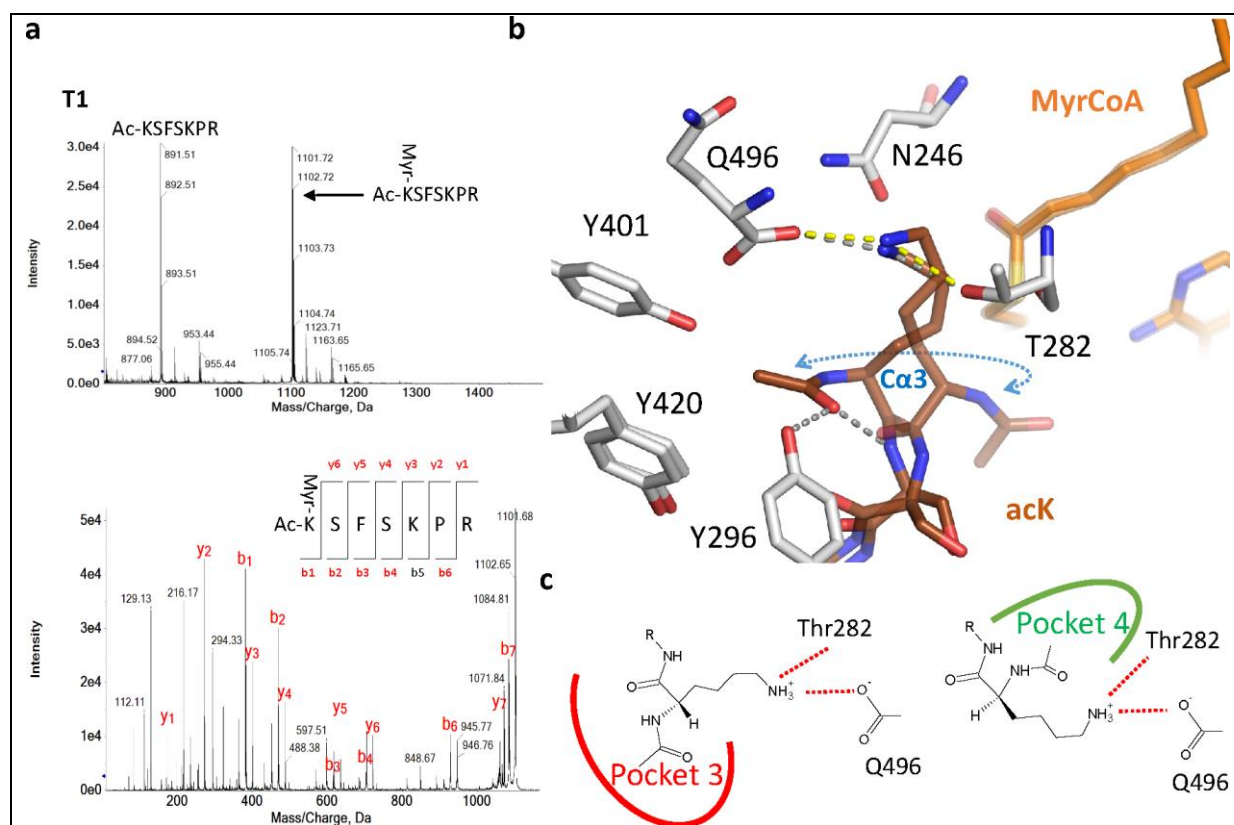

413

### 414 Fig. 4. K-myristoylation mechanism on an N-terminal side chain

415 The crystal structure of the complex made between acK and HsNMT1 is displayed. (a) MS analysis  
416 showing myristoylation of the acK; top MS1, bottom MS2. (b) The two conformations are displayed,  
417 and the rotation point around Cα3 is indicated. (c) Planar representation showing how each  
418 conformation may position the ac chain within pocket 3 (conformation A, left hand side) or pocket 4  
419 (conformation B, right hand side).

420

421 Interestingly, the IpaJ product of G-myristoylation of this peptide started with GK to form  
422 GKFSSKPR (GKFS), which displayed reduced myristoylation efficiency (**Fig. 1b**). This  
423 peptide could be further myristoylated at T3 to produce a 1,116 Da form. MS2 analysis revealed  
424 K-myristoylation at the N-terminal K3 of this peptide (**Extended Data 4d**). To obtain a simpler  
425 set of products for the pipeline, we further characterized the myristoylation profile of GKFS in  
426 the IpaJ workflow (**Fig. 3c,d,e**). This peptide underwent both G- and K-myristoylation. GKFS  
427 features a bulky residue at position 4 and a small residue at position 5. We hypothesized that  
428 while a spacer is mandatory for both myristoylation types, either myristoylation might be  
429 favored depending on as yet unknown amino acid requirements occurring in that spacer (i.e.,  
430 aa4-5, the two residues switched in the GK series). This is likely, as both pockets 4 and 5 are  
431 large enough to accommodate all side chains<sup>16</sup>, so some combinations could favor K-  
432 myristoylation in a GK-starting context.

433

434 We found no straightforward natural chassis in human sequences starting with a G2 that leads  
435 to competition between K- and G-myristoylation and a systematic preference for G-  
436 myristoylation in sequences originating from co-translational myristoylation. When we applied  
437 the IpaJ pipeline to GK-starting peptides derived from the human myristoylome and exploited  
438 its enhanced sensitivity to detect K-myristoylation, we observed that most displayed the  
439 myristoylated peptide at T2 after IpaJ cleavage (**Supplementary Table 1e**). Therefore,  
440 competition exists between G- and K-myristoylation on GK-starting peptides. Furthermore,  
441 none of these peptides displayed a hydrophobic residue at position 4, explaining why the K-  
442 myristoylation/G-myristoylation ratio was smaller than with the GKFS peptide and why  
443 prototypic K-myristoylation ions were not detected in MS2 spectra. Nevertheless, as  
444 myristoylation can also arise from post-translational addition provided that a cleavage  
445 generates a new K-accepting site, competition favoring K-myristoylation is likely. Indeed, as

446 noted above, hundreds of internal proteins display an F/L4 profile (**Supplementary Table 2a**;  
447 see columns aa3, F3, and L3 corresponding to this position, as all sequences start at the  
448 cleavage site and not the unprocessed M1).

449

450 In conclusion, a G at the N-terminus of peptides with GKFXSK motifs sustains competition  
451 between K- and G-myristoylation. These data also indicate that the KXXSK motif – not only  
452 [G]KX[FL]SK – is indicative of K-myristoylation independent of the residue preceding the  
453 K.

454

#### 455 **IpaJ reveals that K-myristoylation may also occur on free or acetylated K1**

456 When the IpaJ/NMT pipeline was applied to either the myristoylated GGKFSSKPR or the  
457 GKFSKPR peptides (see above and **Fig. 4a**), IpaJ-induced cleavage of this reaction product  
458 also led to myristoylation of an unexpected K-starting peptide resulting from reiterated G-  
459 myristoylation IpaJ cleavage of each new G-myristoylation product. Although we could not  
460 distinguish alpha and epsilon myristoylation, side-chain modification was expected (K-  
461 myristoylation). Taking into account the S<sub>6</sub>K<sub>7</sub> clamping of the peptide at the peptide-binding  
462 site, 3D molecular modeling indicated that the N-terminal free amino group would be too  
463 distant from the catalytic base for myristoylation. To test the hypothesis of K-myristoylation,  
464 we first prepared an acetylated (i.e., N- $\alpha$ -blocked derivative) of the GK peptide starting with  
465 K3 (acK). In the presence of MyrCoA and NMT, this peptide was myristoylated with catalytic  
466 efficiencies similar to the previously tested peptides (**Fig. 2a, Supplementary Table 1c**).  
467 When the N-terminal acK was installed at the N-terminus of a peptide with the aa4-5 spacer  
468 shortened to only one residue, myristoylation was no longer observed (acK $\Delta$ S, **Supplementary**  
469 **Table 1c**). Finally, we checked that such K-starting peptides derived from the GK (K) and

470 HPCA chassis (K-HPCA) underwent K-myristoylation (**Fig. 2a, Supplementary Table 1c**).  
471 The crystal structure of the complex between NMT and an acK derivative revealed two  
472 alternative structures, both of which supported a K-myristoylation mechanism involving direct  
473 interaction between the K side chain and the catalytic base (**Fig. 4b**). The group around C $\alpha$ 3  
474 could be retrieved in two opposite directions: the first showed the *ac* group entering either  
475 pocket 3 mimicking an N side chain (**Fig. 4c**) while the overall active site positioning mimicked  
476 that observed with GK; and the second revealed the *ac* moiety occupying part of pocket 4,  
477 which is large enough to host two moieties (i.e., *ac* and S4 in acK) from the same peptide (**Fig.**  
478 **4b,c, right**). We concluded that side chain myristoylation can also occur on an N-terminal K  
479 (K1) regardless of acetylation status and that might result from post-translational proteolytic  
480 cleavages such as those induced by IpaJ during the course of *Shigella* infection.

481  
482 We next interrogated the 15 GK starting peptides derived from different human proteins using  
483 the IpaJ pipeline (**Supplementary Table 1e**). As noted above, because they mostly resulted in  
484 G-myristoylation, they are likely to generate K1 N-termini after IpaJ cleavage. **Supplementary**  
485 **Fig. 7** summarizes such behavior with HPCA. As expected, there was evidence of K1-  
486 myristoylation at T3, further indicating that all such peptides can undergo K-myristoylation  
487 after IpaJ cleavage (**Supplementary Dataset 1**). We conclude that all GK-starting proteins  
488 likely undergo post-translational K-myristoylation after IpaJ cleavage.

489

#### 490 **K-myristoylation-inspired design of potent NMT inhibitors**

491 The data above use synthetic K mimics to assess the effects of the side-chain length, and in  
492 doing so we noticed that ac[Orn], ac[Dap], A[Orn], and acG[Dab] do not undergo  
493 myristoylation even at the highest NMT concentrations (**Fig. 2a and Supplementary Dataset**



494 **1**), unlike their close homologs, acK, AK, and acGK. We hypothesized that such compounds  
495 might act as NMT inhibitors. While the ac[Dap] derivative was a poor inhibitor with an  
496 inhibition constant of  $11 \pm 1 \mu\text{M}$ , the ac[Orn] derivative showed an order of magnitude higher  
497 affinity (**Fig. 5a**), suggesting that the N-terminal reactive amino group – if properly aligned  
498 with the  $\alpha$ -carbon through 2-3 carbon bonds like in Orn or Dab – might contribute to binding  
499 while not promoting catalysis. This encouraged us to further design and study compounds with  
500 variations around N-terminal Orn and Dab derivatives based on the GK sequence.

501  
502 We first assessed acG[Dab], [Dab], and A[Orn], all of which acted as potent competitive  
503 inhibitors with  $\text{IC}_{50}$  values of the order of the NMT concentration used in the assay, indicating  
504 a tight binding constant in the low micromolar range (i.e.,  $<0.4 \mu\text{M}$ ; **Fig. 5a**). Dab and Orn but  
505 not Lys clearly led to strong inhibition.

506  
507 To modify the amino group orientation towards the catalytic base and to mimic the G-  
508 myristoylation productive mechanism, we built two derivatives with D-Orn - the enantiomeric  
509 stereoisomer of L-Orn (**Fig. 5b**; symmetric branching of  $R_1$  and  $R_2$  with respect to  $C\alpha_3$ ) - either  
510 with *ac* or acG to optimize the filling of pocket 3. Interestingly, the ac[D-Orn] derivative was  
511 a remarkably close mimic of a GN3 variant (**Extended Data 5a**), while our previous work  
512 revealed that N is favored in pocket 3<sup>1,16</sup>. Both D-Orn derivatives were potent inhibitors, with  
513 the *ac* version the most potent ( $K_D=50 \text{ nM}$ ). A similar result was observed with ac[D-Dab] or  
514 A[D-Orn] derivatives (**Fig. 5a**), and acG[D-Orn], G[D-Orn], or [D-Orn] derivatives were also  
515 strong inhibitors but to a lesser extent than ac[D-Orn]. When ac[D-Orn] was installed on the  
516 NCS1 chassis – i.e., without a hydrophobic position at position 5 – significant, though weak,  
517 myristoylation was observed (**Supplementary Table 1c**). This indicated that potent inhibition

518 was only possible with an optimal fit for K-myristoylation including a hydrophobic residue  
 519 filling pocket 5.  
 520

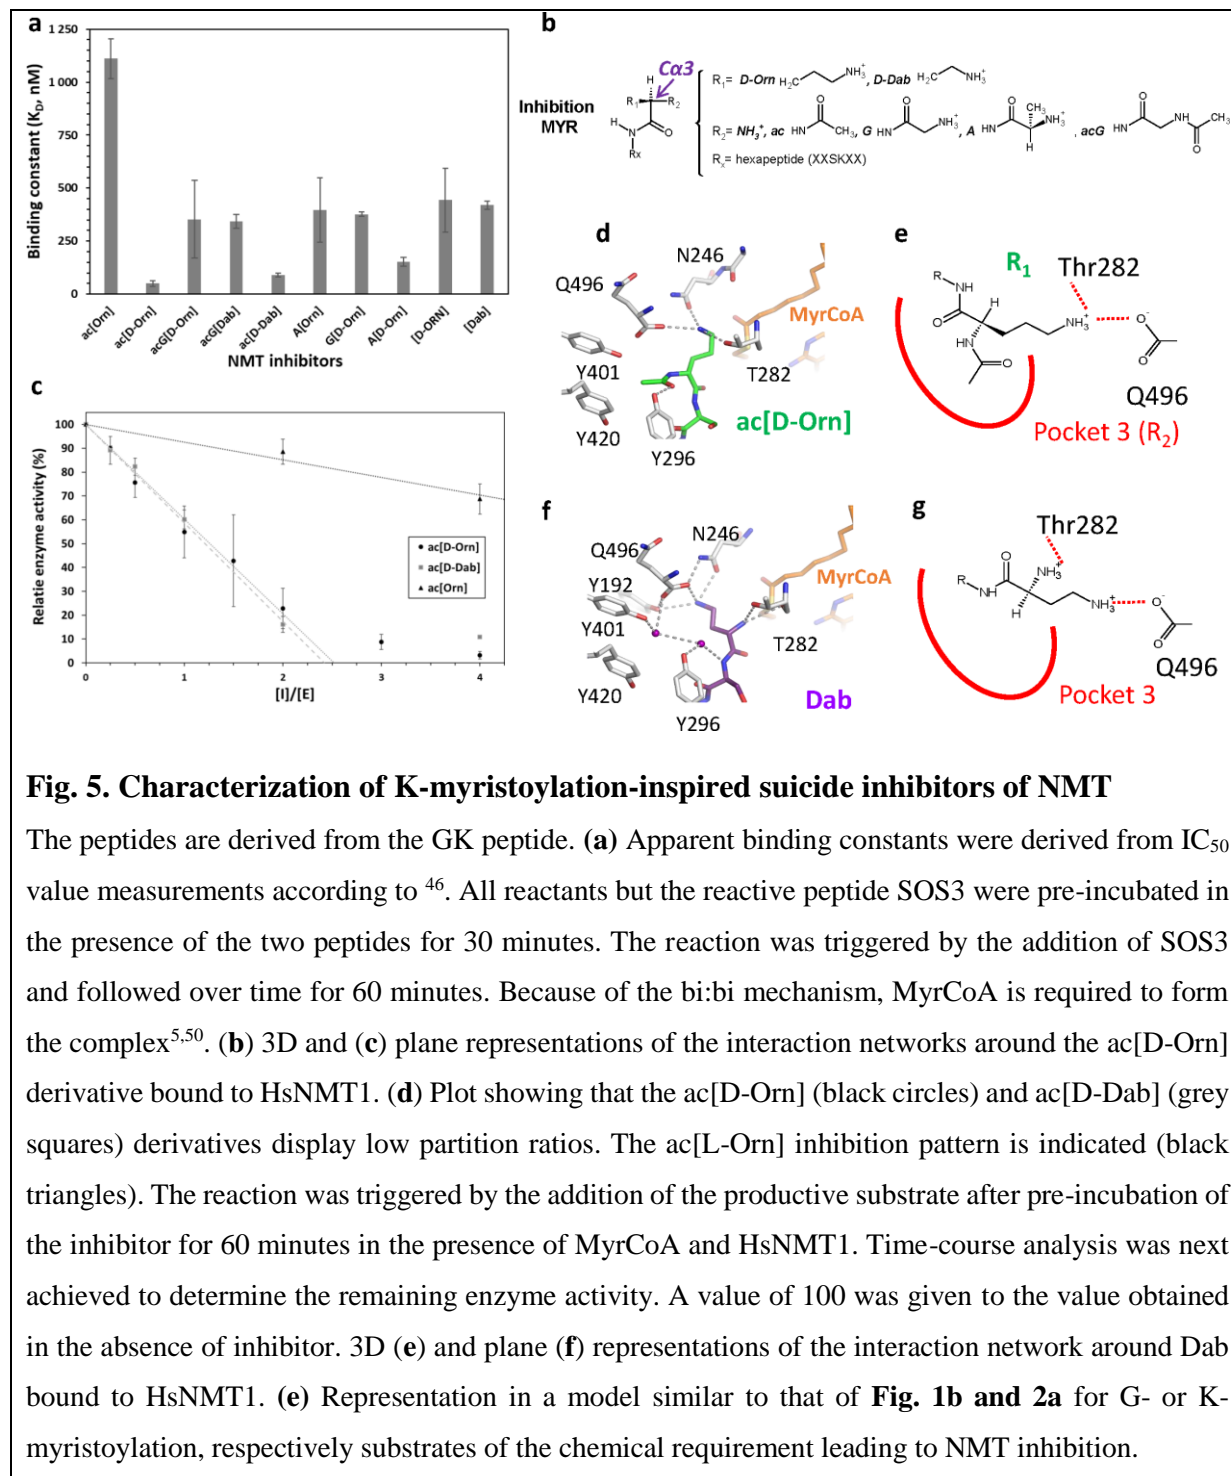

521

## 522 Fig. 5. Characterization of K-myristoylation-inspired suicide inhibitors of NMT

523 The peptides are derived from the GK peptide. (a) Apparent binding constants were derived from IC<sub>50</sub>  
 524 value measurements according to <sup>46</sup>. All reactants but the reactive peptide SOS3 were pre-incubated in  
 525 the presence of the two peptides for 30 minutes. The reaction was triggered by the addition of SOS3  
 526 and followed over time for 60 minutes. Because of the bi:bi mechanism, MyrCoA is required to form  
 527 the complex<sup>5,50</sup>. (b) 3D and (c) plane representations of the interaction networks around the ac[D-Orn]  
 528 derivative bound to HsNMT1. (d) Plot showing that the ac[D-Orn] (black circles) and ac[D-Dab] (grey  
 529 squares) derivatives display low partition ratios. The ac[L-Orn] inhibition pattern is indicated (black  
 530 triangles). The reaction was triggered by the addition of the productive substrate after pre-incubation of  
 531 the inhibitor for 60 minutes in the presence of MyrCoA and HsNMT1. Time-course analysis was next  
 532 achieved to determine the remaining enzyme activity. A value of 100 was given to the value obtained  
 533 in the absence of inhibitor. 3D (e) and plane (f) representations of the interaction network around Dab  
 534 bound to HsNMT1. (e) Representation in a model similar to that of Fig. 1b and 2a for G- or K-  
 535 myristoylation, respectively substrates of the chemical requirement leading to NMT inhibition.

536



537 Prolonged incubation with NMT followed by MS analysis of the reaction products of the above  
538 inhibitors revealed product formation, though to a much lower level than the substrate.  
539 Furthermore, these peptides acted as suicide inhibitors (i.e., the unreleased product was the  
540 effective inhibitor). Indeed, pre-incubation of the inhibitors with the enzyme and MyrCoA  
541 rapidly inactivated the enzyme, indicating conversion of the inhibitors bound to the enzyme  
542 into a one- to two-order of magnitude more potent inhibitor. We concluded that these inhibitors  
543 behave as single-turnover substrates<sup>27</sup>. There was also a partition ratio of 1.5 of either D-Dab  
544 or D-Orn derivatives of the *ac* series (**Fig. 5c**), indicating very high inactivation efficiency with  
545 an inhibition on-rate similar to that of the off-rate.

546

547 Finally, we obtained the crystal structure of ac[D-Orn] and [Dab] in complex with NMT and  
548 retrieved the complex before conversion of the substrate into a product (**Fig. 5d-g**). The  
549 complex featured direct binding of the D-Orn and Dab amino groups to the carboxy terminal  
550 base. The reactive amino group of the Dab side chain bonded directly with the carboxy-  
551 terminal base of NMT through two alternative orientations flipped around C $\alpha$ 3, one of which  
552 revealed a bond between the N $\alpha$  ammonium and Thr282 (**Fig. 5f-g, Extended Data 5b,c**).  
553 Such direct bonding of the reactive amino group of both inhibitors is unlike the efficient GK  
554 peptide, which requires water-mediated binding, instead being more similar to the AK substrate  
555 derivative binding (**Fig. 3**). According to our data, this direct salt bridge created in the context  
556 of the Orn or Dab side chains, which leads to optimal sizing, is expected to be stronger than  
557 the one made with K and at least 100-fold less prone to reaction as a result. This likely explains  
558 the lesser reactivity and the inhibitory behavior. Both compounds bound to Thr282 (**Fig. 5d-**  
559 **g**). The non-acetylated Dab compound featured a water network within pocket 3 indicative of  
560 less bonding compared to both acetyl derivatives, perhaps explaining its lower binding  
561 constant.

562 In conclusion, (i) the chain length bringing the reactive amino group, (ii) the chiral  
563 conformation of the substituents R<sub>1</sub> and R<sub>2</sub> of the C $\alpha$  group facing pocket 3 (C $\alpha$ 3; compare  
564 **Figs. 1e, 2f and 5b**), and (iii) optimal occupation of pocket 3 by a moderately bulky N-terminal  
565 moiety mimicking N were mandatory for effective K-myristoylation mechanism-based design  
566 of NMT inhibitors.

567

## 568 **DISCUSSION**

569 N-myristoyltransferases (NMT), also known as glycylopeptide N-tetradecanoyltransferases (EC  
570 2.3.1.97; see BRENDA resource<sup>28</sup>), are the only enzymes known to catalyze N-myristoylation  
571 in eukaryotes. It was long believed that NMT only co-translationally transferred a lipid  
572 (myristate) to the  $\alpha$ -amino group of the N-terminal amino group of G-starting proteins mostly  
573 exposed by the prior action of methionine aminopeptidases (MetAP). Recent crystal structures  
574 of NMTs co-crystallized with G-starting substrates have revealed how the side chains of these  
575 substrates are recognized and lie within dedicated cavities (pockets 3-8; <sup>1,16,17</sup>), characteristics  
576 that contribute to the G-starting recognition pattern. Although this G-starting recognition  
577 pattern appeared to clearly define a global specificity, it did not explain the entire NMT-  
578 dependent myristoylation landscape. This was even more evident when we and others reported  
579 the possibility that NMTs catalyze K-myristoylation<sup>17,18</sup>. Although this K-myristoylation  
580 function should expand the range of NMT substrates, the extent and clues ruling NMT-  
581 dependent K-myristoylation are unknown.

582

583 Here we disclose the unique and common specificities underlying NMT-dependent G- and K-  
584 myristoylation. We reveal that the main specificity rules for NMT-dependent G- and K-  
585 myristoylation partially overlap, leading to competition between the two types of

586 myristoylation in GK-starting contexts. The myristoylation rules are summarized in **Figs. 1e**  
587 **and 2f**. The very narrow shape of pocket 2 ensures reactivity of a primary amino borne only  
588 on unbranched moieties such as N-terminal glycine or side chains like lysine, which facilitates  
589 the 70° rotation of the amino-reactive group from the catalytic base towards the thio-reacting  
590 group of MyrCoA. This motion allows Wat3 to enter from the water channel and play a crucial  
591 role at the transition state<sup>17</sup>. The addition of a methyl group such as in A2 or meG variants  
592 makes this motion unlikely and dramatically decreases catalysis. The rules directing G- or side  
593 chain-myristoylation are predominantly determined by the R<sub>1</sub> and R<sub>2</sub> chemical groups  
594 branched at Cα3. NMT usually favors G- over K-myristoylation on proteins starting with G,  
595 while K-myristoylation dominates on any other N-terminal chain.

596

597 Overall, NMT-dependent K-myristoylation is less efficient than G-myristoylation whatever the  
598 context. Although the two myristoylation types may directly act on an N-terminal residue, K-  
599 myristoylation appears less strict than G-myristoylation in this regard; indeed, K-  
600 myristoylation does not require a given side chain of the first amino acid but relies on optimized  
601 residues at positions 5-7. A major difference between the two myristoylation types is that K-  
602 myristoylation needs the KXXSK-restricted pattern. This is unlike G-myristoylation, which  
603 allows the modification of many proteins not exhibiting the S<sub>6</sub>K<sub>7</sub> motif by NMT on their N-  
604 terminal G (see <sup>16</sup> and **Supplementary Table 1a**). The KXXSK motif of K-myristoylation can  
605 be associated with a one amino acid extension or acetylation at the N-terminus provided that  
606 an *ad hoc* proteolytic machinery can produce these extremities. The specificity of MetAPs -  
607 which remove the first M from proteins - favors new N-terminal residues with short side chains  
608 like A, G, P, or S. A survey of the human proteome reveals, however, no K-myristoylation on  
609 either K2, K3, or K4 and 15 G-myristoylation substrates in the subset of proteins arising from  
610 MetAP-guided co-translational cleavage rules. Among MetAP unprocessed substrates, five

611 MK-starting proteins were identified, but we ruled out that they might undergo K-  
612 myristoylation. A number of internal KXXSK K-myristoylation motifs are preceded by caspase  
613 cleavage sites in the human proteome suggesting that K-myristoylation - in contrast to mostly  
614 co-translational G-myristoylation - results from post-translational addition, for instance  
615 initiated by cleavage by specific caspases during apoptosis<sup>15,29</sup>.

616

617 We show that post-translational myristoylation may occur either after initial G-myristoylation,  
618 causing double myristoylation, or upon protease cleavage. This includes the action of bacterial  
619 protease IpaJ, which we used as a case study and as a unique tool to discriminate between G-  
620 and K-myristoylation. Our data confirm that ARF6 is myristoylated in both states<sup>17,18</sup>, in  
621 contrast to the other ARFs (ARF1/3/4/5) or ARL1, which do not feature a K3 like ARF6. This  
622 insensitivity of ARF6 to IpaJ was initially proposed to be due to ARF6 not being located at the  
623 ER/Golgi, unlike the other members of the ARF/ARL family, but rather at the plasma  
624 membrane. ARF6 translocates to endosomes, where it acts as a major regulator of  
625 endocytosis<sup>30,31</sup>. Our data indicate that ARF6 resistance to IpaJ might also result from the  
626 unmasking of a myristoylatable K3 upon G-myristoylation cleavage. As a result, ARF6 would  
627 still be myristoylated and retained on myristoylation affinity azido-biotin prior to and after IpaJ  
628 cleavage.

629

630 We noticed that K-myristoylation or any other side chain myristoylation systematically  
631 reduced  $k_{cat}$  values, making the reaction poorly efficient. The associated  $k_{cat}$  values were  
632 significantly lower than G-myristoylation and in the low range of reported values<sup>32</sup>. These data,  
633 together with the observation of direct, non-water mediated bonding of the reactive amino  
634 group of the side chain to the catalytic base, suggested the occurrence of long-lasting enzyme-  
635 ligand or enzyme-product intermediary complexes prior to product release. Taking advantage

636 of this observation, we designed a series of NMT inhibitors based on our new knowledge of  
637 the determinants of side chain myristoylation. Specifically, a K-myristoylation substrate could  
638 be turned into a very potent suicide inhibitor through simple manipulation around the acceptor  
639 side chain, i.e., the stereo-isomeric D version of a K-mimicking, shorter side chain, including  
640 Orn or Dab. This reflects the tight fit of the active site and mechanism of both K- and G-  
641 myristoylation and highlights that even very small modifications (such as methylene variations,  
642 e.g., G2 to A or me-Gly for G-myristoylation, acK to ac[Orn] for K-myristoylation) produce  
643 distinct and significant effects on the reaction outcome.

644

645 To conclude, this study extends our knowledge of the subproteome, which is sensitive to NMT-  
646 guided myristoylation, and provides new understanding about the subtle requirements for  
647 specific NMT inhibition.

648

## 649 **ACKNOWLEDGMENTS**

650 This work was supported by French National Research Agency (ANR) DynaMYT (ANR-20-  
651 CE44-0013) and Fondation ARC (ARCPJA32020060002137) grants to TM. This work has  
652 benefited from the support of a French State grant (ANR-17-EUR-0007, EUR SPS-GSR)  
653 managed by the ANR under an Investments for the Future program (ANR-11-IDEX-0003-02),  
654 from the I2BC crystallization platform supported by FRISBI (ANR-10-INSB-05-01), and from  
655 the facilities and expertise of the I2BC proteomic platform SICaPS, supported by IBiSA, Ile  
656 de France Region, Plan Cancer, CNRS and Paris-Sud University. FR is supported by grants  
657 from Région Ile-de-France (17012695) and Fondation pour la Recherche Médicale  
658 (FDT202001010779). We warmly acknowledge Odile Schiltz (IPBS, Toulouse), Virginie  
659 Redeker, Jean-Pierre Le Caer, Laila Sago and David Cornu (all at SICaPS, Gif/Yvette) for their

660 extensive support with mass spectrometry analyses. We thank the French National Synchrotron  
661 Facility (SOLEIL) for providing synchrotron radiation facilities and the staff of the Proxima 1  
662 & 2 beamlines.

663

#### 664 **AUTHOR CONTRIBUTIONS**

665 FR conducted all MS experiments and kinetic analyses, characterized IpaJ variants, and set up  
666 the IpaJ/NMT pipeline. CD undertook cloning, mutagenesis, and purification of IpaJ and  
667 performed all NMT structural analyses. RFD completed and consolidated the kinetic analysis.  
668 TM and CG conceived the project, supervised the experiments and analyzed the data. FR, CD,  
669 CG and TM, wrote the manuscript.

670

#### 671 **DATA AVAILABILITY**

672 The nine crystal structures of NMT in complex with MyrCoA and the peptides reported here  
673 have been deposited at the PDB under codes 7OWM, 7OWN, 7OWO, 7OWP, 7OWQ, 7OWR,  
674 7OWS, 7OWT and 7OWU.

675

#### 676 **COMPETING INTERESTS**

677 The authors declare no competing interests.

678

#### 679 **ADDITIONAL INFORMATION**

680 Supplementary information is available for this paper.

## 681 **METHODS**

### 682 **Chemicals**

683 All peptides (see all sequences in **Supplementary Tables 1**) were purchased at 95% purity  
684 (Genscript, Leiden, Netherlands). NAD was purchased from Roche (Basel, Switzerland). All  
685 other chemicals were purchased from Sigma-Aldrich (St. Quentin, France). Stock solutions of  
686 myristoyl-CoA (0.2 mM) were prepared in sodium acetate, pH 5.6, and 1% Triton X-100,  
687 except for MALDI analysis, where cholate was used to reduce background.

688 Because the N-terminal myristoylated G residue is usually the second in the original open  
689 reading frame (ORF) after the initial M, we call it aa2 as the extreme N-terminal residue  
690 throughout this work for consistency with previous work from ourselves and others.

### 691 ***IpaJ* cloning**

692 Wild-type full-length *IpaJ* numbering is used throughout the text. The nucleotide sequence  
693 encoding residues including the final TGA stop codon of *S. flexneri IpaJ* ORF (UniProt code  
694 Q54150) was optimized for *E. coli* expression (**Supplementary Table 3**) and synthesized *in*  
695 *vitro* (Genscript). For protein expression, the 30-259 fragment was cloned between the *NcoI*  
696 and *HindIII* restriction sites of expression vector pETM30 as a C-terminal fusion with  
697 glutathione S-transferase (GST, **Extended Data 2a**). A His-tag was placed at the N-terminus  
698 of the fusion to facilitate protein purification (see below). A TEV cleavage sequence inserted  
699 between the two ORFs allowed release of *IpaJ* from GST with only an additional N-terminal  
700 G-Ala-Met-Ala tetrapeptide sequence upstream of R30, the first residue of *IpaJ*. Two variants  
701 were created by site-directed mutagenesis using a QuikChange site-directed mutagenesis kit  
702 (Stratagene, San Diego, CA) with the primer pairs displayed in **Supplementary Table 3**. The  
703 first variant was inactive (C64S), while the other (3M) was fully active with improved  
704 solubility and stability over time (L97N/L99N/C103S).

## 705 **Enzyme production and purification**

706 *HsNMT1*. The *HsNMT1l* isoform containing residues 81-496 corresponds to the major  
707 isoform<sup>3</sup>. *HsNMT1l* was cloned into pET16b as an N-terminal His-tag fusion<sup>3</sup>, and the  
708 recombinant protein was expressed and purified as described<sup>16</sup>. Isoform *HsNMT1s* containing  
709 residues 99-496 was cloned into pET28 and purified as described<sup>17</sup>.

710 The three soluble 30-259 variants of the protease IpaJ were produced as follows.  
711 Rosetta2pLysS cells expressing the pETM30 derivative were grown in 1 L of 2xTY medium  
712 supplemented with kanamycin (50 µg/mL) and chloramphenicol (34 µg/mL) at 37°C under  
713 vigorous shaking. Protein overexpression was induced with 0.5 mM IPTG at OD<sub>600</sub>=0.4. Cells  
714 were transferred at 20°C and grown for 20 hours. Cells were centrifuged at 10,000 x g, and the  
715 pellet was resuspended (10 mL/g) in lysis buffer (20 mM Tris pH=8.0, 0.2 M NaCl, 5 mM 2-  
716 mercaptoethanol, 5 mM imidazole, 5% glycerol). Cells were lysed with a sonicator Q700  
717 (amplitude 50%, 10 s on and 20 s off) for 3 min at 4°C. The sample was then centrifuged at  
718 40,000 x g (Rotor JA20) for 30 min and the pellet discarded. The supernatant was loaded on a  
719 Ni-IMAC-HisTrap<sup>TM</sup> FF 5 mL column (GE Healthcare, Chicago, IL) at 3.5 mL/min; elution  
720 was achieved with a linear 0-0.5M imidazole gradient run over 100 ml. Purified proteins were  
721 dialyzed in Spectra-Por7 semi-permeable dialysis membranes (8 kDa cut-off; Thermo Fisher  
722 Scientific, Waltham, MA) for 48 hours against conservation buffer (20 mM Tris pH=8.0, 0.2  
723 M NaCl, 5 mM dithiothreitol, 55% glycerol) at 4°C. The sample was stored at -20°C.  
724 Protein concentrations were measured with the Bio-Rad Protein Assay Kit using bovine serum  
725 albumin (Sigma-Aldrich) as reference.

## 726 **Protein crystallization and structure determination**

727 *HsNMT1:MyrCoA:X structure*. *HsNMT1s* was used to solve the structures of the complexes  
728 with nine different peptides in the course of this study (HPCA, AK, AcK, AcG[Orn], AN,



729 meGN, GGK, Dab and ac[D-Orn] with PDB entries 7OWM, 7OWN, 7OWO, 7OWP, 7OWU,  
730 7OWQ, 7OWR, 7OWS and 7OWT, respectively. Suitable crystals of  
731 HsNMT1:MyrCoA:peptide substrates or inhibitors were obtained by co-crystallization using  
732 the hanging-drop vapor diffusion method at 20°C in the crystallization conditions previously  
733 described<sup>16,17</sup>. Briefly, crystallization droplets were formed by mixing 2  $\mu$ L of the of  
734 HsNMT1:MyrCoA:peptide complex (ratio 1:1.5:1.5) at 6-9 mg/mL with 2  $\mu$ L of the precipitant  
735 solution containing either 0.1 M MgCl<sub>2</sub>, 0.2 M NaCl, 0.1 M sodium citrate pH 5.6, and 18-24%  
736 (w/v) PEG 6K or 0.1 M sodium acetate pH 4.6, and 18-24% (w/v) PEG 6K. Crystals were  
737 cryoprotected in the reservoir solution supplemented with 15% (v/v) glycerol and flash cooled  
738 in liquid nitrogen. Complete X-ray datasets of complex were collected at 100K a single  
739 wavelength from a single crystal at the French National Synchrotron Facility (SOLEIL)  
740 PROXIMA1 (for HPCA and AcG[Orn] at  $\lambda=0.98400$  Å and AcK at  $\lambda=0.97856$  Å) or  
741 PROXIMA2 (for AK and GGK at  $\lambda=0.98012$  Å and Dab and Ac[D-ORN] at  $\lambda=0.97563$  Å)  
742 beamlines and at European Radiation Synchrotron Facility (ESRF) ID30A1 (for AN at  
743  $\lambda=0.96600$  Å) and ID30A3 (for me-GN  $\lambda=0.96775$  Å) beamlines. Datasets were integrated  
744 with XDS<sup>33</sup> and scaled and reduced using AIMLESS from the CCP4 package<sup>34</sup>. For crystals  
745 that suffered from anisotropic diffraction (HPCA, AcK and GGK), data were processed with  
746 STARANISO on unmerged data<sup>35</sup> before AIMLESS data reduction. Crystals belonged  
747 essentially to the space group P2<sub>1</sub>2<sub>1</sub>2 with similar unit cell parameters with the exception of  
748 GGK and meGN belonging both to C2 with similar unit cell parameters (summarized in  
749 **Supplementary Table 4**). In both space groups identified, unit cells contained two NMT  
750 molecules per asymmetric unit. Structure resolution was accomplished in all cases using the  
751 molecular replacement method and solved using PHASER<sup>36</sup> and the  
752 HsNMT1:MyrCoA:peptide ternary complex (PDB entry 5O9T or 6SK2) as a search model.

753 The structure of AN was solved using MOLREP<sup>37</sup> and protein coordinates of  
754 HsNMT1:MyrCoA (PDB entry 5O9T) as a search model. Structures were subjected to  
755 alternating refinement cycles using PHENIX and manual model building using COOT<sup>38-40</sup>. The  
756 good quality of the electron density maps also enabled the refinement of substrate peptide,  
757 reaction intermediate, and reaction product molecules bound to HsNMT1 in each complex.  
758 Chemical compound libraries were generated using PRODRG server<sup>41</sup> in combination with  
759 eLBOW from the PHENIX suite. The geometry of the final models was validated using  
760 MOLPROBITY<sup>42</sup>. Figures were generated using PYMOL (DeLano Scientific LLC,  
761 <http://pymol.sourceforge.net/>). X-ray data collection and refinement statistics are summarized  
762 in **Supplementary Table 4**.

### 763 **Measurements of activity and inhibition parameters**

764 HsNMT1 activity was assayed at 30°C in a coupled assay using an updated version of the  
765 previously described protocol<sup>43</sup>. The reaction mixture contained 50 mM Tris-HCl (pH 8.0), 1  
766 mM MgCl<sub>2</sub>, 0.193 mM EGTA, 0.32 mM DTT, 0.2 mM thiamine pyrophosphate, 2 mM  
767 pyruvate, 0.1 mg/mL of BSA, 0.1% Triton X-100, 2.5 mM NAD<sup>+</sup>, 0.125 units/mL of porcine  
768 heart PDH (0.33 units/mg), 40 μM myristoyl-CoA, and 1-2000 μM peptides. Unless otherwise  
769 stated for tight binding studies, the reaction mixture was pre-incubated for 3 min at 30°C before  
770 starting the reaction by adding MyrCoA. A final volume of 200 μL was used in 96-well black  
771 plates (Grenier Bio One and Dominique Dutscher, Brumath, France; the optical path for 0.2  
772 mL is 0.55 cm). A value of 6300 M<sup>-1</sup>.s<sup>-1</sup> was used as the molecular extinction coefficient of  
773 NADH at 340 nm. An Infinite M Nano<sup>+</sup> plate reader equipped with micro-injectors (Tecan,  
774 Lyon, France) was set at 340 nm to monitor the absorbance over time at 30°C. Briefly, a  
775 reaction mixture containing HsNMT1 at different concentrations of peptide acceptors was pre-  
776 incubated for 3 min at 30°C before starting the reaction with MyrCoA.

777 Myristoylation kinetics were monitored continuously for 30 min, and the data were fitted as to  
778 obtain the initial velocities associated to each peptide concentration. Curve fits to obtain kinetic  
779 parameters were achieved by non-linear regression with GraphPad Prism 9.1 (GraphPad  
780 Software, La Jolla, CA). Parameters with standard errors were computed for all parameters  
781 using the complete dataset including replicates. Both  $k_{cat}$  and  $K_m$  kinetic parameters were  
782 obtained by fitting to the Michaelis–Menten equation.  $k_{cat}/K_m$  values and the associated  
783 standard deviations were obtained by taking advantage of the  $k_{SP}$  approach<sup>44</sup> with  $k_{SP}=k_{cat}/K_m$   
784 and  $v_0/[E]=k_{SP}[S]/(1+[S]/K_m)$ , where  $v_0$  is the reaction rate measured at NMT concentration  
785  $[E_0]$ .

786 For inhibition assays, we used the same reaction mixture for 30 min at 30°C incubation in the  
787 presence of the inhibitor peptide and MyrCoA. The reaction was triggered by the addition of  
788 SOS3 peptide and monitored for 30 min. Inhibition curves and associated  $IC_{50}$  values were  
789 fitted with the absolute  $IC_{50}$  module with baseline set at 0. Inhibition constants were calculated  
790 as described in<sup>45-47</sup> with  $K_I=(IC_{50}-[E])/2/(1+[S]/K_m)$ . The HsNMT1 concentration was 0.25  
791  $\mu\text{M}$ , and the substrate (G<sub>2</sub>CSVKKK; SOS3;  $K_m=18\pm 3 \mu\text{M}$ <sup>43,48</sup>) was used at a concentration of  
792 20  $\mu\text{M}$ .

793 The NMT/IpaJ pipeline described in **Fig. 5b** first involved incubation of the peptide (100  $\mu\text{M}$ )  
794 for 1 hour in the presence of 0.5  $\mu\text{M}$  HsNMT1 or HsNMT2 (T1). The buffer was the same as  
795 for NMT activity measurement but contained cholate (5  $\mu\text{M}$ ) instead of Triton X-100. Full IpaJ  
796 cleavage conditions involved further incubation at 20°C for 1 hour in the presence of 10  $\mu\text{M}$   
797 IpaJ-3M (T2). 5  $\mu\text{M}$  HsNMT1 was finally added for 60 min at 30°C (T3). T0 corresponded to  
798 the T3 time (3 hours) with the peptide diluted in the incubation buffer but in the absence of any  
799 enzyme.

## 800 **Mass spectrometry**

801 300  $\mu$ L of a mixture containing 50 mM Tris (pH 8), 0.193 mM EGTA, 1 mM  $MgCl_2$ , 1 mM  
802 DTT, 5  $\mu$ M sodium cholate, 40  $\mu$ M Myr-CoA solution (stock solution 0.2 mM Myr-CoA, 10  
803 mM sodium acetate, 2.5  $\mu$ M sodium cholate), 0.5  $\mu$ M NMT, and 100  $\mu$ M of synthetic peptide  
804 were pre-incubated at 30°C. The myristoylation reaction was followed over time by collection  
805 of 10  $\mu$ L samples further diluted in 90  $\mu$ L of water/acetonitrile (90/10) solution. The different  
806 samples were then diluted five times in the matrix solution made of 5 mg/mL of  $\alpha$ -cyano-4-  
807 hydroxycinnamic acid solubilized in water/formic acid/acetonitrile (50/50/0.1%). 1  $\mu$ L of each  
808 dilution was spotted on a metal target and dried. MS and MS/MS spectra of each sample were  
809 acquired with an AB SCIEX 5800 MALDI-Tof-Tof instrument in positive ion mode as  
810 reported in SI. Survey scans were performed using delayed extraction (390 ns) in reflector  
811 mode for a total of 15,000 shots. MS/MS scans were operated with a collision energy of 1 kV.  
812 Peptide and fragment mass tolerances were set at 10 ppm and 0.8 Da, respectively. Mass  
813 spectra were analyzed with Peakview software (AB Sciex, Macclesfield, UK), and MS2  
814 analysis was performed with ProteinProspector v6.2.2  
815 (<https://prospector.ucsf.edu/prospector/mshome.htm>)<sup>49</sup>. All spectra are available in  
816 **Supplementary Dataset 1**. Theoretical mass values were calculated at  
817 [https://web.expasy.org/peptide\\_mass/](https://web.expasy.org/peptide_mass/).

818

## 819 REFERENCES

- 820 1. Meinel, T., Dian, C. & Giglione, C. Myristoylation, an ancient protein modification  
821 mirroring eukaryogenesis and evolution. *Trends Biochem Sci* **45**, 619-632 (2020).
- 822 2. Lodge, J.K., Johnson, R.L., Weinberg, R.A. & Gordon, J.I. Comparison of myristoyl-  
823 CoA:protein N-myristoyltransferases from three pathogenic fungi: *Cryptococcus neoformans*,  
824 *Histoplasma capsulatum*, and *Candida albicans*. *J Biol Chem* **269**, 2996-3009 (1994).

- 825 3. Pierre, M. et al. N-Myristoylation regulates the SnRK1 pathway in Arabidopsis. *Plant*  
826 *Cell* **19**, 2804-2821 (2007).
- 827 4. Price, H.P. et al. Myristoyl-CoA:protein N-myristoyltransferase, an essential enzyme  
828 and potential drug target in kinetoplastid parasites. *J Biol Chem* **278**, 7206-14 (2003).
- 829 5. Bhatnagar, R.S., Ashrafi, K., Futterer, K., Waksman, G. & Gordon, J.I. Biology and  
830 enzymology of protein N-myristoylation. in *The enzymes*, Vol. XXI (Protein lipidation) (eds.  
831 Tamanoi, F. & Sigman, D.S.) 241-286 (Academic Press, San Diego, 2001).
- 832 6. Resh, M.D. Trafficking and signaling by fatty-acylated and prenylated proteins. *Nat*  
833 *Chem Biol* **2**, 584-90 (2006).
- 834 7. Traverso, J.A. et al. Roles of N-Terminal fatty acid acylations in membrane  
835 compartment partitioning: Arabidopsis h-type thioredoxins as a case study. *Plant Cell* **25**,  
836 1056-77 (2013).
- 837 8. Frearson, J.A. et al. N-myristoyltransferase inhibitors as new leads to treat sleeping  
838 sickness. *Nature* **464**, 728-32 (2010).
- 839 9. Wright, M.H. et al. Validation of N-myristoyltransferase as an antimalarial drug target  
840 using an integrated chemical biology approach. *Nat Chem* **6**, 112-21 (2014).
- 841 10. Wright, M.H., Paape, D., Price, H.P., Smith, D.F. & Tate, E.W. Global profiling and  
842 inhibition of protein lipidation in vector and host stages of the sleeping sickness parasite  
843 *Trypanosoma brucei*. *ACS Infect Dis* **2**, 427-441 (2016).
- 844 11. Mousnier, A. et al. Fragment-derived inhibitors of human N-myristoyltransferase block  
845 capsid assembly and replication of the common cold virus. *Nat Chem* **10**, 599-606 (2018).
- 846 12. Beauchamp, E. et al. Targeting N-myristoylation for therapy of B-cell lymphomas. *Nat*  
847 *Commun* **11**, 5348 (2020).

- 848 13. Kosciuk, T. & Lin, H. N-Myristoyltransferase as a glycine and lysine  
849 myristoyltransferase in cancer, immunity, and infections. *ACS Chem Biol* **15**, 1747-1758  
850 (2020).
- 851 14. Martin, D.D., Beauchamp, E. & Berthiaume, L.G. Post-translational myristoylation:  
852 Fat matters in cellular life and death. *Biochimie* **93**, 18-31 (2011).
- 853 15. Thinon, E. et al. Global profiling of co- and post-translationally N-myristoylated  
854 proteomes in human cells. *Nat Commun* **5**, 4919 (2014).
- 855 16. Castrec, B. et al. Structural and genomic decoding of human and plant myristoylomes  
856 reveals a definitive recognition pattern. *Nat Chem Biol* **14**, 671-679 (2018).
- 857 17. Dian, C. et al. High-resolution snapshots of human N-myristoyltransferase in action  
858 illuminate a mechanism promoting N-terminal Lys and Gly myristoylation. *Nat Commun* **11**,  
859 1132 (2020).
- 860 18. Kosciuk, T. et al. NMT1 and NMT2 are lysine myristoyltransferases regulating the  
861 ARF6 GTPase cycle. *Nat Commun* **11**, 1067 (2020).
- 862 19. Carr, S.A., Biemann, K., Shoji, S., Parmelee, D.C. & Titani, K. n-Tetradecanoyl is the  
863 NH<sub>2</sub>-terminal blocking group of the catalytic subunit of cyclic AMP-dependent protein kinase  
864 from bovine cardiac muscle. *Proc Natl Acad Sci U S A* **79**, 6128-31 (1982).
- 865 20. Gheorghe, M.T. & Bergman, T. Deacetylation and internal cleavage of polypeptides  
866 for N-Terminal sequence analysis. in *Methods in Protein Structure Analysis* (eds. Atassi, M.Z.  
867 & Appella, E.) 81-86 (Springer, Boston, MA, 1995).
- 868 21. Leone, J.W. et al. Removal of N-terminal blocking groups from proteins. *Curr Protoc*  
869 *Protein Sci* **63**, 11.7.1-11.7.20 (2011).
- 870 22. Mattock, E. & Blocker, A.J. How do the virulence factors of *Shigella* work together to  
871 cause disease? *Front Cell Infect Microbiol* **7**(2017).

- 872 23. Burnaevskiy, N., Peng, T., Reddick, L.E., Hang, H.C. & Alto, N.M. Myristoylome  
873 profiling reveals a concerted mechanism of ARF GTPase deacylation by the bacterial protease  
874 IpaJ. *Mol Cell* **58**, 110-22 (2015).
- 875 24. Burnaevskiy, N. et al. Proteolytic elimination of N-myristoyl modifications by the  
876 *Shigella* virulence factor IpaJ. *Nature* **496**, 106-9 (2013).
- 877 25. Boisson, B., Giglione, C. & Meinnel, T. Unexpected protein families including cell  
878 defense components feature in the N-myristoylome of a higher eukaryote. *J Biol Chem* **278**,  
879 43418-43429 (2003).
- 880 26. Utsumi, T. et al. Vertical-scanning mutagenesis of amino acids in a model N-  
881 myristoylation motif reveals the major amino-terminal sequence requirements for protein N-  
882 myristoylation. *Eur J Biochem* **271**, 863-74 (2004).
- 883 27. Houglund, J.L. et al. Identification of novel peptide substrates for protein  
884 farnesyltransferase reveals two substrate classes with distinct sequence selectivities. *J Mol Biol*  
885 **395**, 176-90 (2010).
- 886 28. Chang, A. et al. BRENDA, the ELIXIR core data resource in 2021: new developments  
887 and updates. *Nucleic Acids Res* **49**, D498-D508 (2021).
- 888 29. Zha, J., Weiler, S., Oh, K.J., Wei, M.C. & Korsmeyer, S.J. Posttranslational N-  
889 myristoylation of BID as a molecular switch for targeting mitochondria and apoptosis. *Science*  
890 **290**, 1761-1765 (2000).
- 891 30. Donaldson, J.G. Multiple roles for Arf6: sorting, structuring, and signaling at the  
892 plasma membrane. *J Biol Chem* **278**, 41573-41576 (2003).
- 893 31. Donaldson, J.G. & Jackson, C.L. ARF family G proteins and their regulators: roles in  
894 membrane transport, development and disease. *Nat Rev Mol Cell Biol* **12**, 362-75 (2011).
- 895 32. Bar-Even, A. et al. The moderately efficient enzyme: evolutionary and  
896 physicochemical trends shaping enzyme parameters. *Biochemistry* **50**, 4402-10 (2011).



- 897 33. Kabsch, W. Automatic processing of rotation diffraction data from crystals of initially  
898 unknown symmetry and cell constants. *J. Appl. Cryst.* **26**, 795-800 (1993).
- 899 34. Evans, P.R. & Murshudov, G.N. How good are my data and what is the resolution?  
900 *Acta Crystallogr D Biol Crystallogr* **69**, 1204-14 (2013).
- 901 35. Tickle, I.J. et al. STARANISO ([http://staraniso.globalphasing.org/cgi-](http://staraniso.globalphasing.org/cgi-bin/staraniso.cgi)  
902 [bin/staraniso.cgi](http://staraniso.globalphasing.org/cgi-bin/staraniso.cgi)). (Global Phasing Ltd. , Cambridge, United Kingdom, 2018).
- 903 36. McCoy, A.J. et al. Phaser crystallographic software. *J Appl Crystallogr* **40**, 658-674  
904 (2007).
- 905 37. Vagin, A. & Teplyakov, A. MOLREP: an automated program for molecular  
906 replacement. *J. Appl. Cryst.* **30**, 1022-1225 (1997).
- 907 38. Murshudov, G.N. et al. REFMAC5 for the refinement of macromolecular crystal  
908 structures. *Acta Crystallogr D Biol Crystallogr* **67**, 355-67 (2011).
- 909 39. Adams, P.D. et al. PHENIX: a comprehensive Python-based system for  
910 macromolecular structure solution. *Acta Crystallogr D Biol Crystallogr* **66**, 213-21 (2010).
- 911 40. Emsley, P., Lohkamp, B., Scott, W.G. & Cowtan, K. Features and development of  
912 Coot. *Acta Crystallogr D Biol Crystallogr* **66**, 486-501 (2010).
- 913 41. Schuttelkopf, A.W. & van Aalten, D.M. PRODRG: a tool for high-throughput  
914 crystallography of protein-ligand complexes. *Acta Crystallogr D Biol Crystallogr* **60**, 1355-63  
915 (2004).
- 916 42. Chen, V.B. et al. MolProbity: all-atom structure validation for macromolecular  
917 crystallography. *Acta Crystallogr D Biol Crystallogr* **66**, 12-21 (2010).
- 918 43. Boisson, B. & Meinnel, T. A continuous assay of myristoyl-CoA:protein N-  
919 myristoyltransferase for proteomic analysis. *Anal Biochem* **322**, 116-123 (2003).
- 920 44. Johnson, K.A. New standards for collecting and fitting steady state kinetic data.  
921 *Beilstein J Org Chem* **15**, 16-29 (2019).



- 922 45. Copeland, R.A. *Evaluation of enzyme inhibitors in drug discovery: a guide for*  
923 *medicinal chemists and pharmacologists*, 296 (John Wiley & Sons, New Jersey, 2005).
- 924 46. Copeland, R.A., Lombardo, D., Giannaras, J. & Decicco, C.P. Estimating KI values for  
925 tight binding inhibitors from dose-response plots. *Bioorg Med Chem Lett* **5**, 1947-1952 (1995).
- 926 47. Fieulaine, S. et al. Trapping conformational states along ligand-binding dynamics of  
927 peptide deformylase: the impact of induced fit on enzyme catalysis. *PLoS Biol* **9**, e1001066  
928 (2011).
- 929 48. Traverso, J.A., Giglione, C. & Meinnel, T. High-throughput profiling of N-  
930 myristoylation substrate specificity across species including pathogens. *Proteomics* **13**, 25-36  
931 (2013).
- 932 49. Chalkley, R.J., Baker, P.R., Medzihradszky, K.F., Lynn, A.J. & Burlingame, A.L. In-  
933 depth analysis of tandem mass spectrometry data from disparate instrument types. *Mol Cell*  
934 *Proteomics* **7**, 2386-98 (2008).
- 935 50. Johnson, D.R., Bhatnagar, R.S., Knoll, L.J. & Gordon, J.I. Genetic and biochemical  
936 studies of protein N-myristoylation. *Annu Rev Biochem* **63**, 869-914 (1994).
- 937 51. Kumar, S., van Raam, B.J., Salvesen, G.S. & Cieplak, P. Caspase cleavage sites in the  
938 human proteome: CaspDB, a database of predicted substrates. *PLoS One* **9**, e110539 (2014).
- 939  
940

941 **EXTENDED DATA**

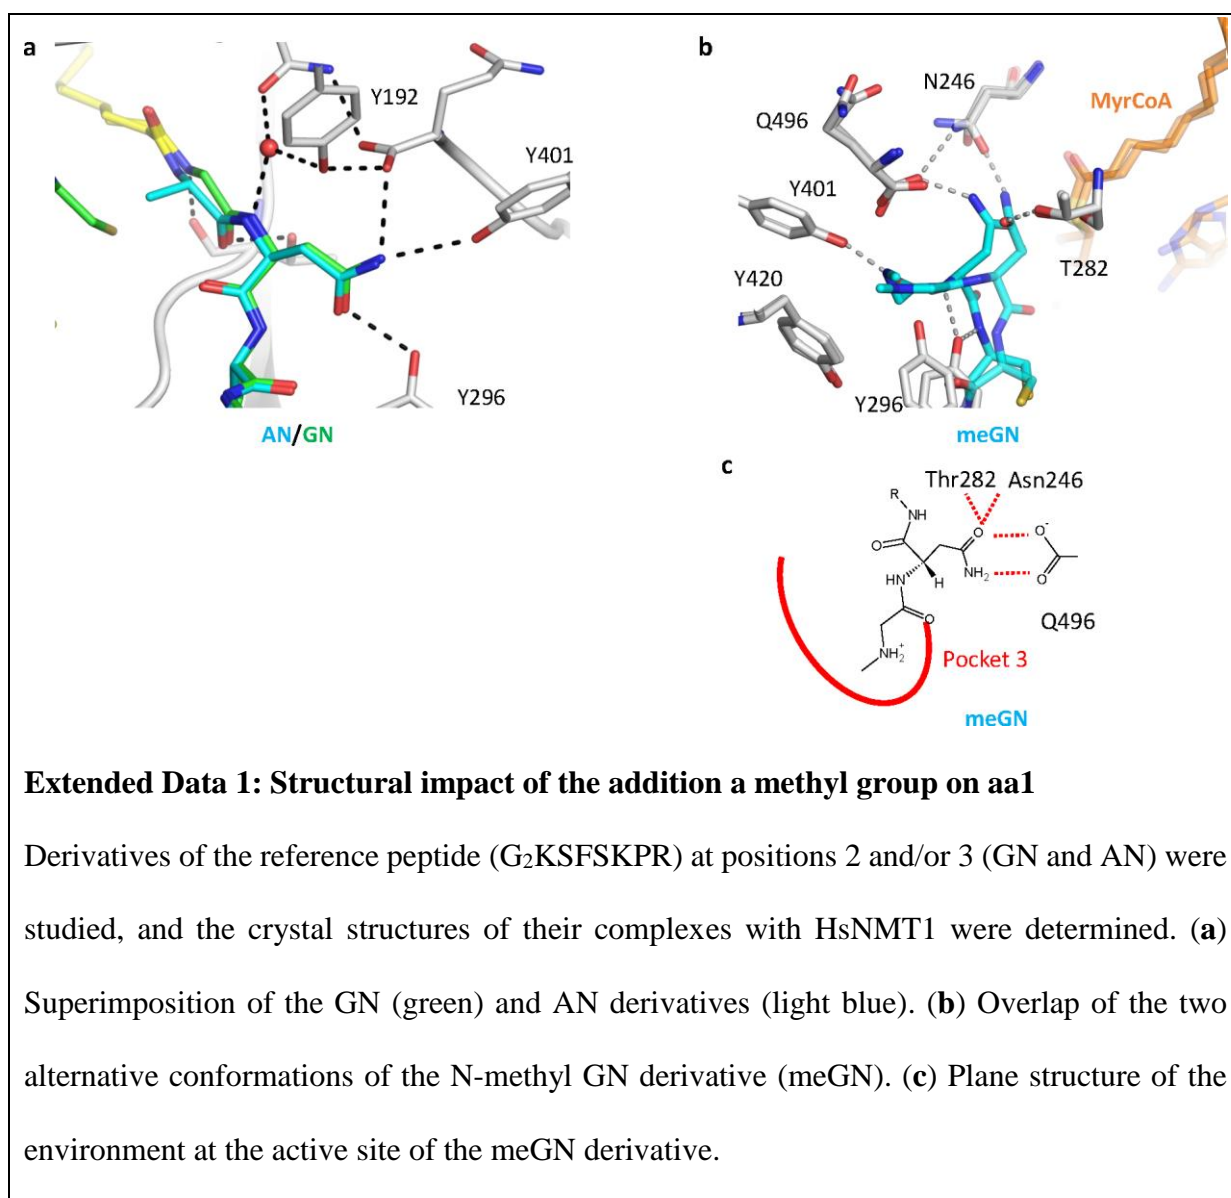

942

943 **Extended Data 1: Structural impact of the addition a methyl group on aa1**

944 Derivatives of the reference peptide (G<sub>2</sub>KSF<sub>2</sub>SKPR) at positions 2 and/or 3 (GN and AN) were  
945 studied, and the crystal structures of their complexes with HsNMT1 were determined. **(a)**

946 Superimposition of the GN (green) and AN derivatives (light blue). **(b)** Overlap of the two  
947 alternative conformations of the N-methyl GN derivative (meGN). **(c)** Plane structure of the

948 environment at the active site of the meGN derivative.

949

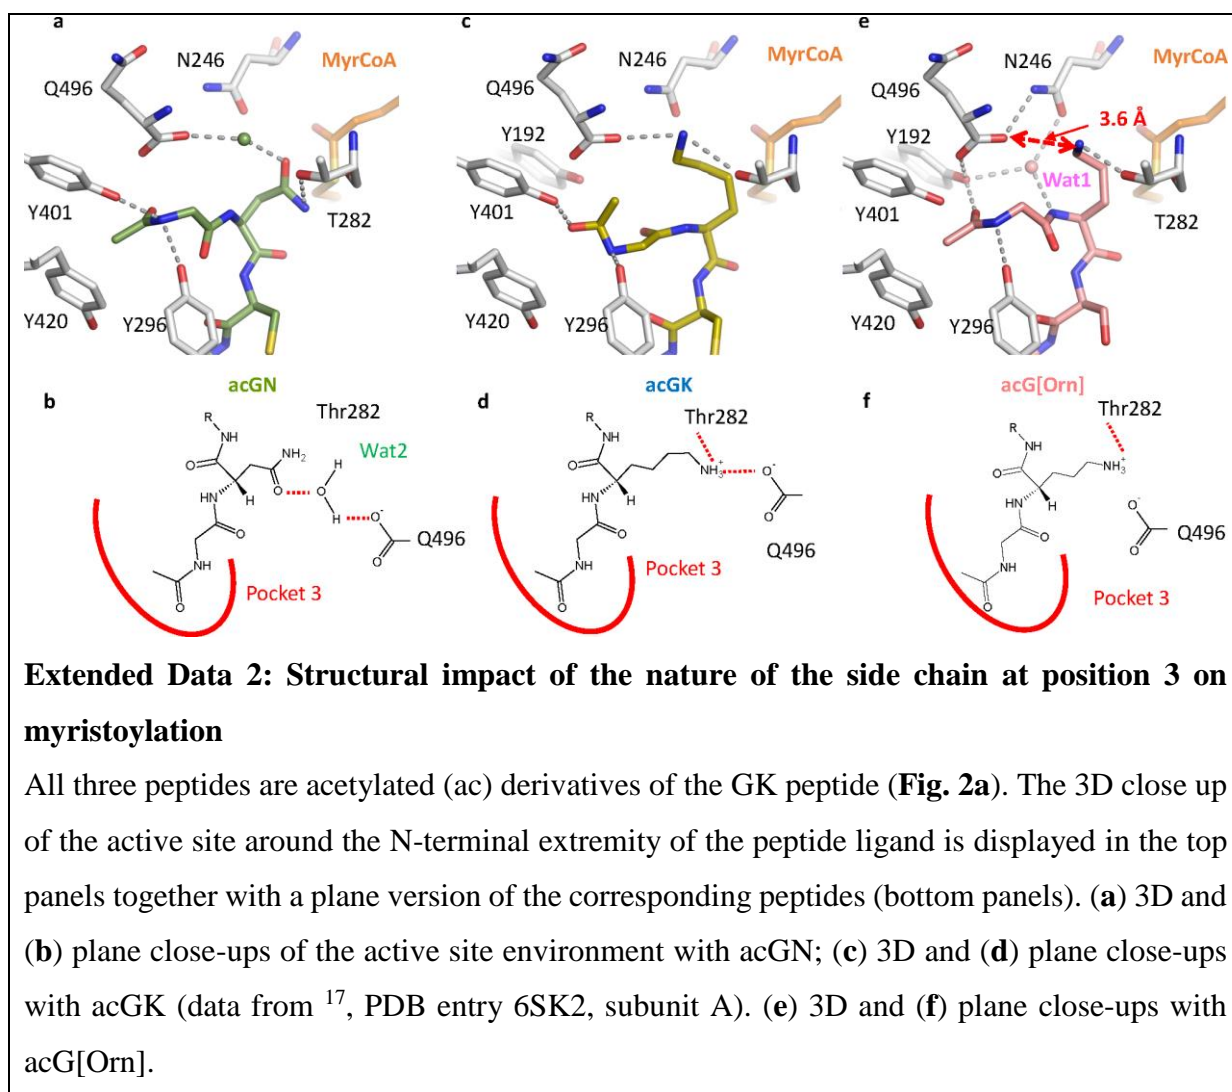

950

951

952

### Extended Data 2: Structural impact of the nature of the side chain at position 3 on myristoylation

953

954

955

956

957

958

959

All three peptides are acetylated (ac) derivatives of the GK peptide (**Fig. 2a**). The 3D close up of the active site around the N-terminal extremity of the peptide ligand is displayed in the top panels together with a plane version of the corresponding peptides (bottom panels). **(a)** 3D and **(b)** plane close-ups of the active site environment with acGN; **(c)** 3D and **(d)** plane close-ups with acGK (data from <sup>17</sup>, PDB entry 6SK2, subunit A). **(e)** 3D and **(f)** plane close-ups with acG[Orn].

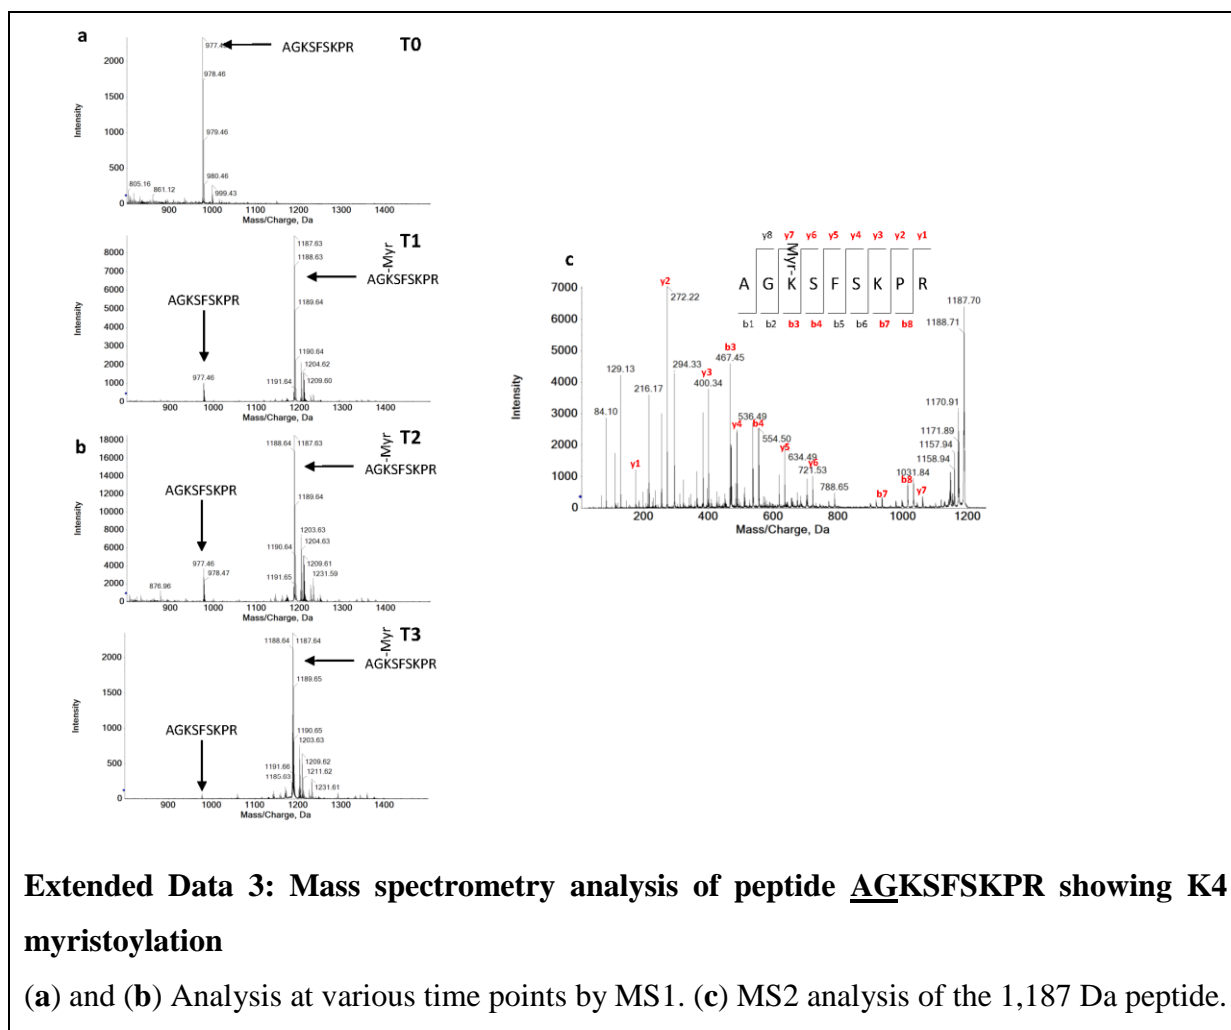

960

961 **Extended Data 3: Mass spectrometry analysis of peptide AGKSFASKPR showing K4**  
962 **myristoylation**

963 (a) and (b) Analysis at various time points by MS1. (c) MS2 analysis of the 1,187 Da peptide.

964

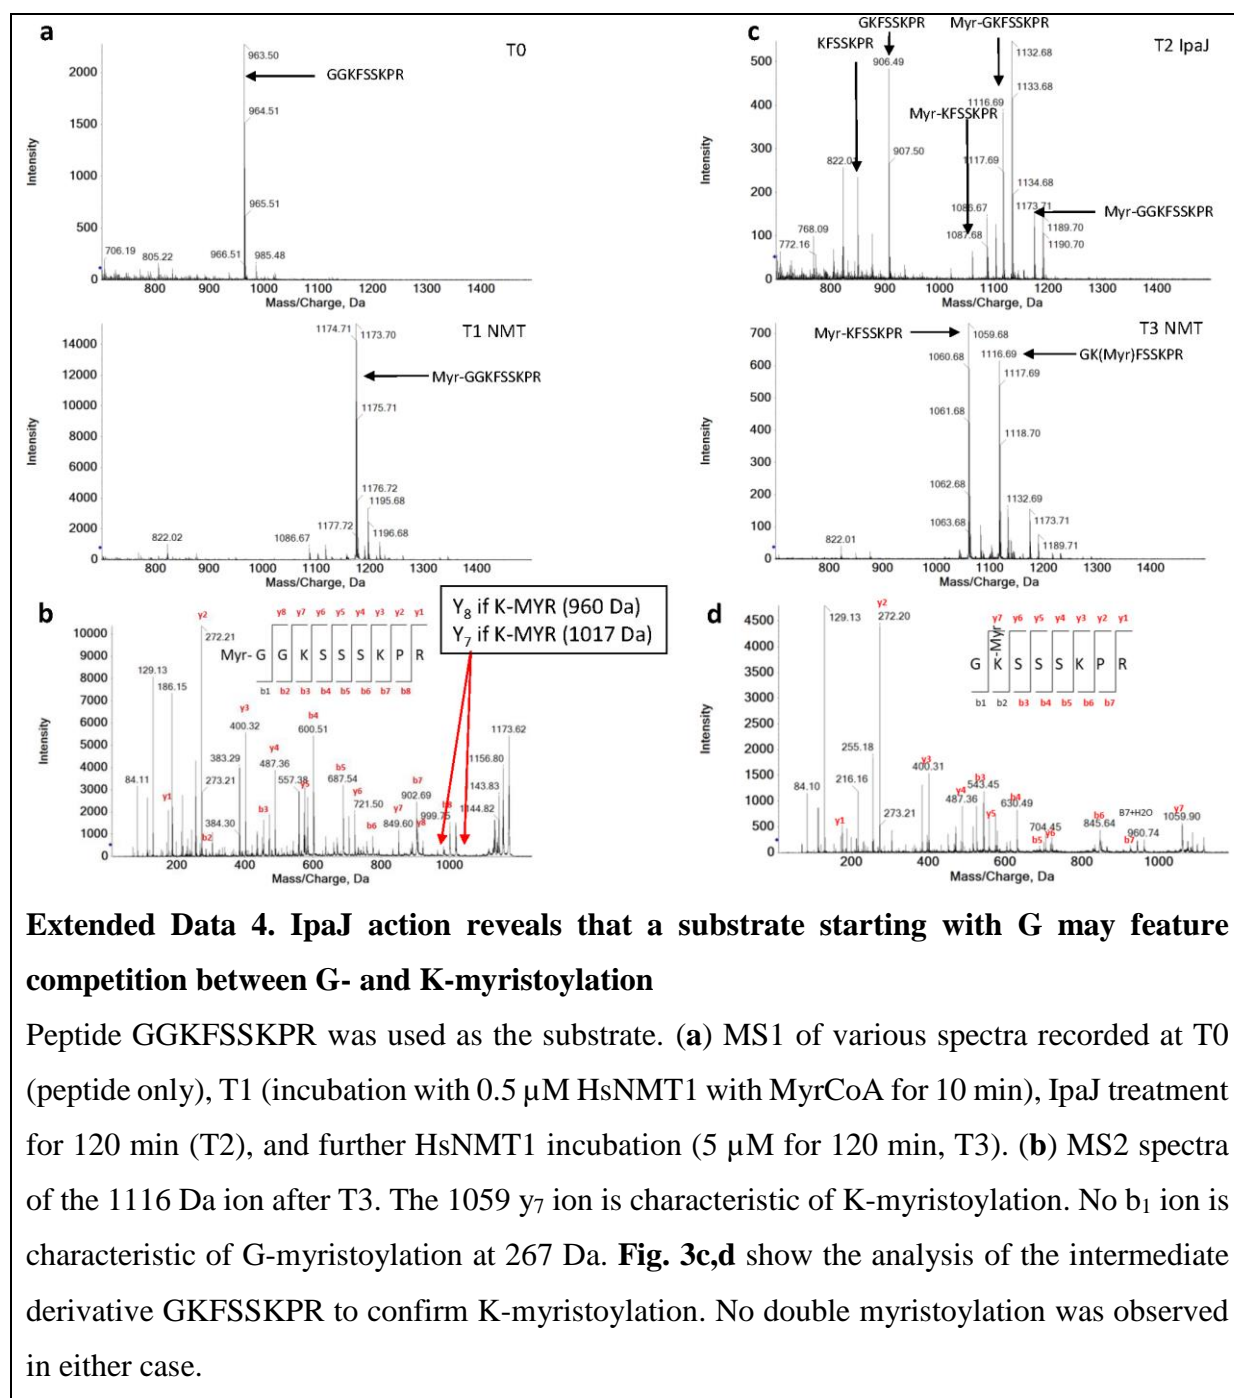

965  
966  
967  
968  
969  
970  
971  
972  
973  
974  
975

**Extended Data 4. IpaJ action reveals that a substrate starting with G may feature competition between G- and K-myristoylation**

Peptide GGKFSSKPR was used as the substrate. (a) MS1 of various spectra recorded at T0 (peptide only), T1 (incubation with 0.5 μM HsNMT1 with MyrCoA for 10 min), IpaJ treatment for 120 min (T2), and further HsNMT1 incubation (5 μM for 120 min, T3). (b) MS2 spectra of the 1116 Da ion after T3. The 1059 y<sub>7</sub> ion is characteristic of K-myristoylation. No b<sub>1</sub> ion is characteristic of G-myristoylation at 267 Da. **Fig. 3c,d** show the analysis of the intermediate derivative GK(FSSK)PR to confirm K-myristoylation. No double myristoylation was observed in either case.

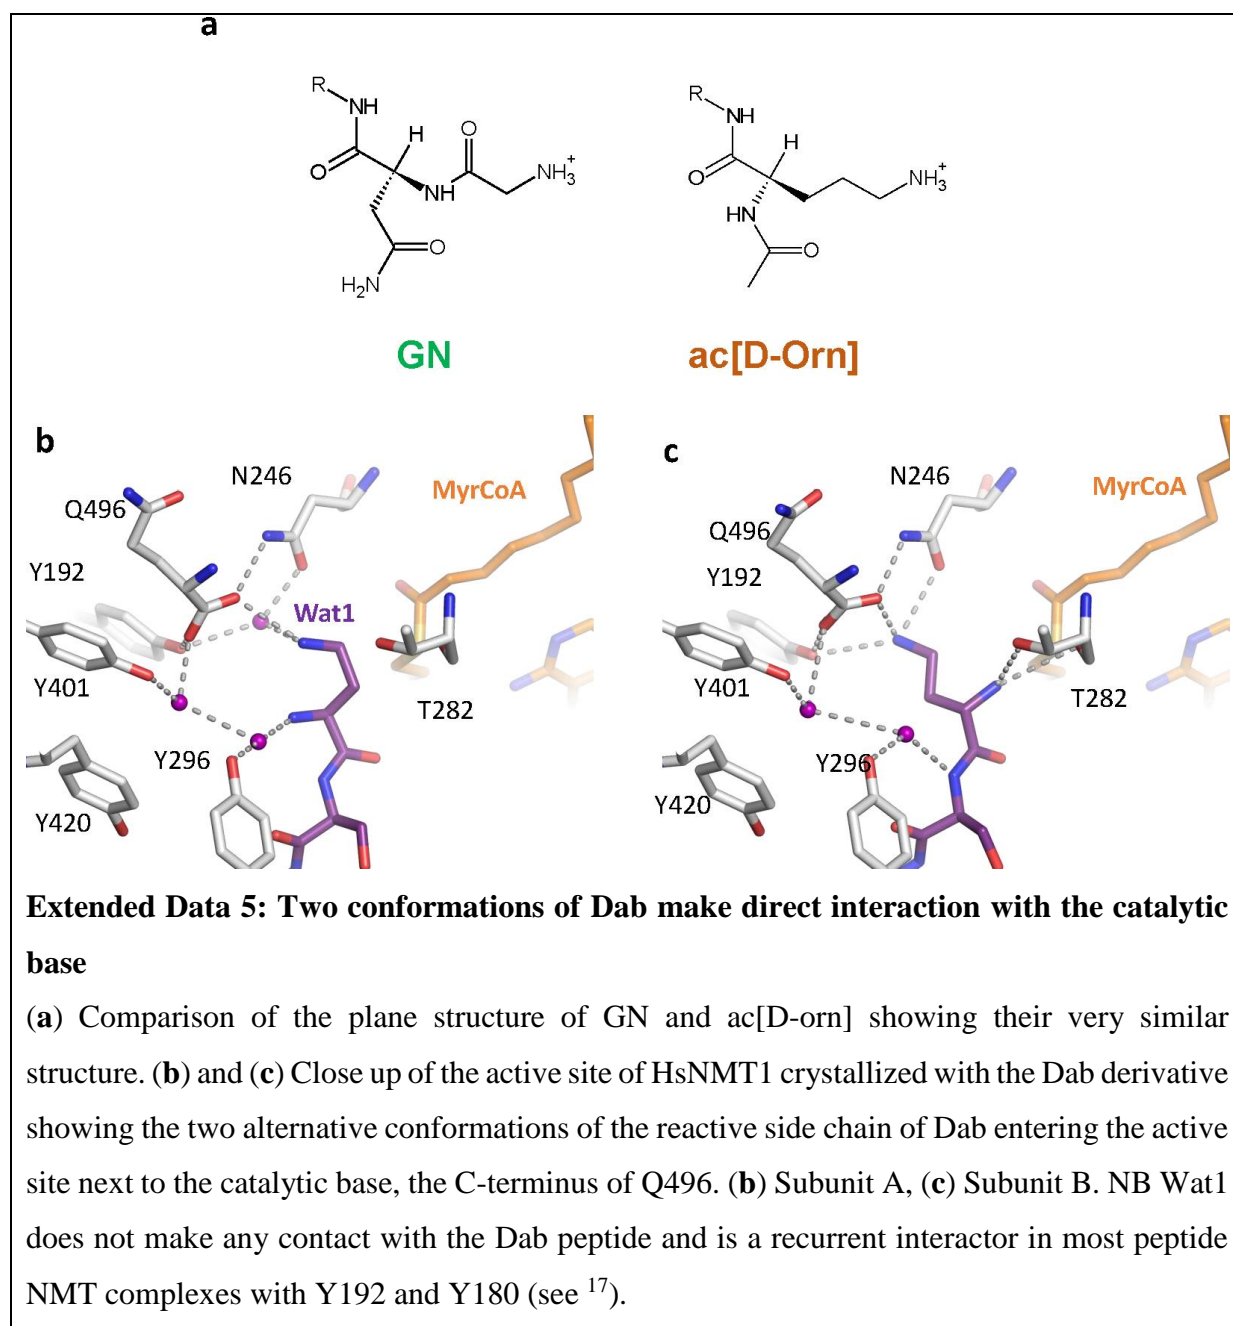

976

977

978

979

980

981

982

983

984

985
